# Supplementary material for: Hearing threshold levels and hearing loss among people in Zhejiang, China: a population-based cross-sectional study
Source: PubMed Central journal article supplement — BMJ Open. 2019 Apr 4;9(4):e027152. doi: 10.1136/bmjopen-2018-027152 (PMC6500382; doi:10.1136/bmjopen-2018-027152), 2019-04-04
Supplement: bmjopen-2018-027152.draft_revisions.pdf [file bmjopen-2018-027152.draft_revisions.pdf]

# BMJ Open

BMJ Open is committed to open peer review. As part of this commitment we make the peer review history of every article we publish publicly available.

When an article is published we post the peer reviewers' comments and the authors' responses online. We also post the versions of the paper that were used during peer review. These are the versions that the peer review comments apply to.

The versions of the paper that follow are the versions that were submitted during the peer review process. They are not the versions of record or the final published versions. They should not be cited or distributed as the published version of this manuscript.

BMJ Open is an open access journal and the full, final, typeset and author-corrected version of record of the manuscript is available on our site with no access controls, subscription charges or pay-per-view fees (<http://bmjopen.bmj.com>).

If you have any questions on BMJ Open's open peer review process please email [info.bmjopen@bmj.com](mailto:info.bmjopen@bmj.com)

# BMJ Open

## Population-based cross-sectional study on the hearing threshold levels and hearing loss among people in Zhejiang, China

|                               |                                                                                                                                                                                                                                                               |
|-------------------------------|---------------------------------------------------------------------------------------------------------------------------------------------------------------------------------------------------------------------------------------------------------------|
| Journal:                      | <i>BMJ Open</i>                                                                                                                                                                                                                                               |
| Manuscript ID                 | bmjopen-2018-027152                                                                                                                                                                                                                                           |
| Article Type:                 | Research                                                                                                                                                                                                                                                      |
| Date Submitted by the Author: | 09-Oct-2018                                                                                                                                                                                                                                                   |
| Complete List of Authors:     | Wang, Dahui; Hangzhou Normal University<br>Zhang, Huai; Hangzhou Normal University,<br>Ma, Haiyan; Hangzhou Normal University<br>Zhang, Long; Hangzhou Normal University<br>Yang, Lei; Hangzhou Normal University<br>Xu, Liangwen; Hangzhou Normal University |
| Keywords:                     | hearing loss, hearing thresholds, lifestyle factors, environmental factors                                                                                                                                                                                    |
|                               |                                                                                                                                                                                                                                                               |

SCHOLARONE™  
Manuscripts

View Only

1  
2  
3 **Population-based cross-sectional study on the hearing threshold**  
4  
5 **levels and hearing loss among people in Zhejiang, China**  
6  
7

8 Dahui Wang <sup>\*a</sup>, Huai Zhang <sup>\*a</sup>, Haiyan Ma <sup>a</sup>, Long Zhang <sup>a</sup>, Lei Yang <sup>✉a</sup>,

9  
10 Liangwen Xu <sup>✉a</sup>  
11

12 <sup>a</sup> The Medical School, Hangzhou Normal University, Hangzhou, Zhejiang, China.  
13  
14

15  
16  
17 \* These authors contributed equally to this work.  
18

19 **Word count:** 2662 words in Main Text; 215 words in Abstract  
20

21 **Total figures:** 4 **Total tables:** 3  
22

23 <sup>✉</sup> Correspondence:  
24

25 Liangwen Xu, Hangzhou Normal University, No.58, Haishu Rd, Cangqian, Yuhang  
26

27 District, Hangzhou, Zhejiang, P.R. China, tel: +86 18857717938, fax:  
28

29 +86-571-28865000, e-mail: [tougaoscihz@163.com](mailto:tougaoscihz@163.com)  
30  
31

32  
33  
34 Lei Yang, Hangzhou Normal University, Zhejiang, P.R. China, tel:  
35

36 +86-571-28865010, fax: +86-571-28865000, e-mail: [yanglei63@hznu.edu.cn](mailto:yanglei63@hznu.edu.cn)  
37  
38  
39  
40  
41  
42  
43  
44  
45  
46  
47  
48  
49  
50  
51  
52  
53  
54  
55  
56  
57  
58  
59  
60

## ABSTRACT

**Objectives:** Hearing loss, as a common chronic condition in humans, is increasingly gaining attention. Relevant research in China is relatively scarce, so we conduct a population-based study to investigate the prevalence of hearing loss among age groups, genders, and ears in Zhejiang province, China.

**Study design:** A Population-based cross sectional study.

**Participants:** 3754 participants aged 18-98 years and living in Zhejiang Province, China.

**Outcome measures:** Pure-tone audiometric thresholds were measured at frequencies of 0.125–8 kHz for each subject. All participants were asked to complete a structured questionnaire, in the presence of a healthcare official.

**Results.** The prevalence of speech-frequency and high-frequency hearing loss was 27.9% and 42.9%, respectively, in Zhejiang. There were significant differences in auditory thresholds at most frequencies among the age groups, genders, and ears. In addition to the common factors affecting both types of hearing loss, significant correlation was found between personal income and speech-frequency hearing loss (odds ratio [OR]=0.69, 95% confidence interval [CI]: 0.52-0.92), and between hyperlipidaemia and high-frequency hearing loss (OR=1.45, 95% CI: 1.02-2.07).

**Conclusion.** The prevalence of hearing loss was high among people living in Zhejiang, particularly males, and in the left ear. Moreover, hearing thresholds increased with age. Several lifestyle and environment factors, which can be influenced by awareness and education, were significantly associated with hearing loss.

**Key words:** hearing loss, hearing thresholds, lifestyle factors, environmental factors.

1  
2  
3  
4  
5 **Strengths and limitations of this study.**  
6

7 To the best of our knowledge, this is a study conducted in Zhejiang, China, involving  
8 a large population, with data from a wide band of hearing frequencies.  
9

10  
11 The study found that several lifestyle and environment factors, which can be  
12 influenced by awareness and education, were significantly associated with hearing  
13 loss.  
14  
15

16  
17 Medical covariates were collected based on self-reported diagnosis, and specific  
18 values were not analysed as these data were not collected completely.  
19  
20  
21  
22  
23  
24  
25  
26  
27  
28  
29  
30  
31  
32  
33  
34  
35  
36  
37  
38  
39  
40  
41  
42  
43  
44  
45  
46  
47  
48  
49  
50  
51  
52  
53  
54  
55  
56  
57  
58  
59  
60

## 1. Introduction

Hearing loss, the most common sensory deficit in humans<sup>1</sup>, is increasingly gaining attention; the World Health Organization estimated that the prevalence of hearing loss increased from 42 million in 1985 to 360 million in 2011.<sup>2</sup> According to a US study, more than 36 million people (16–17% adolescents) suffered from varying degrees of hearing loss.<sup>3</sup> Moreover, Twardella et al. reported that the prevalence of hearing loss among adolescents in Germany was approximately 2.4%.<sup>4</sup> Although the literature on hearing loss has gradually increased, these studies were either conducted in countries other than China, or the number of participants was small.<sup>5</sup> In addition, the hearing test did not cover a wide band of frequencies.<sup>6</sup>

As a common chronic condition in humans, hearing loss affects communication and can, therefore, affect the quality of life of the individual. Furthermore, it has substantial direct and indirect societal costs.<sup>7</sup> Moreover, in the 25-year Global Burden of Disease study, hearing loss was the second most common non-fatal disease affecting the quality of life of Chinese individuals.<sup>8</sup> However, the exact mechanisms of hearing loss remain unclear. Thus, there is an urgent need to study the prevalence of hearing loss and its related risk factors. Several studies have reported that hearing function is associated with age, sex, heredity, and environmental factors (such as noise exposure and heavy metal exposure)<sup>9,10</sup>, but similar research in China is still relatively scarce.

Hence, in the present study, data of audiometric measurements and responses to structured questionnaires were collected to investigate the prevalence of hearing loss in adults in Zhejiang, China; while other Chinese studies were conducted elsewhere, this is the first study to be conducted in Zhejiang with a large sample size and wide band of frequencies. An epidemiological study can well describe the hearing threshold

1  
2  
3 levels and hearing loss in the Chinese population, and provide some data that can be  
4 used to develop interventions for preventing early hearing loss as well as for further  
5 investigation.  
6  
7  
8  
9

## 10 11 **2. Methods**

### 12 ***Study Areas and Participants***

13  
14 A study using a multi-stage stratified cluster random sampling method was conducted  
15 in the Zhejiang province from September 2016 to June 2018. Five healthcare centres  
16 were selected as follows: 1 in Jiangshan, 1 in Jiaxing, and 3 in Hangzhou (Tonglu  
17 county, Baiyang community, and Sijiqing community). Complete audiometric  
18 examination data and questionnaire data of 3754 participants (1900 males and 1854  
19 females) (18–98 years old) were analysed. The participants were divided into 3 age  
20 groups: the young group (18–44 years old, mean age=34.19±6.35), the middle group  
21 (45–59 years old, mean age=51.82±4.34), and the old group (60–98 years old, mean  
22 age=68.07±7.14).<sup>11</sup>  
23  
24  
25  
26  
27  
28  
29  
30  
31  
32  
33  
34

35 The whole process of study was approved by the Ethics Committee of Hangzhou  
36 Normal University. All subjects provided written informed consent and the study had  
37 been performed in accordance with the ethical standards laid down in the 1964  
38 Declaration of Helsinki and its later amendments and local government policies.  
39  
40  
41  
42  
43

### 44 ***Audiometry test***

45  
46 First, otoscopic examination was performed for each participant by an  
47 otolaryngologist to detect any ear pathology potentially affecting hearing function.  
48 Participants who had an ear disease (such as otitis externa, otitis media, or cerumen  
49 impaction) or abnormal ear structure were excluded from the analysis. All pure-tone  
50 air conduction hearing thresholds were measured by trained researchers using  
51  
52  
53  
54  
55  
56  
57  
58  
59  
60

1  
2  
3 audiometers (AT235; Interacoustics AS, Assens, Denmark) with standard headphones  
4 (TDH-39; Telephonic Corporation, Farmingdale, USA). Each subject was specifically  
5 instructed to press a handheld response key as soon as they heard a tone of a  
6 frequency between 0.125 and 8 kHz (0.125, 0.25, 0.5, 1, 2, 3, 4, 6, and 8 kHz) over an  
7 intensity range of -10 to 110 dB in a soundproof booth with background noise of less  
8 than 20 dB(A). All facilities were calibrated before use, and similar to the study  
9 conducted by Wang et al.<sup>5</sup>, we conducted the testing by beginning at 1 kHz,  
10 continuing to higher test frequencies and then returning to 1 kHz, followed by testing  
11 lower frequencies.<sup>5</sup> We computed the pure-tone average (PTA) at speech frequencies  
12 (0.5, 1, 2, and 4 kHz; speech-PTA), and at high frequencies (3, 4, 6, and 8 kHz;  
13 high-PTA).<sup>12</sup> Hearing loss was defined as a PTA of  $\geq 26$  dB in the better ear,<sup>9</sup> which is  
14 consistent with the WHO definition of clinically significant hearing loss,<sup>13</sup> and this  
15 can identify patients with bilateral hearing loss and related functional impairments.<sup>14</sup>

### 31 ***Covariates***

32  
33 All participants were asked to complete a structured questionnaire, in the presence of  
34 a healthcare official, covering demographic variables, audiometric information,  
35 lifestyle and environmental factors, as well as issues related to various risk factors and  
36 diseases. Education level was categorized as elementary school or less, middle school  
37 graduation, high school graduation, and college or more. Average monthly income  
38 was classified into 3 categories (low:  $\leq 4000$  RMB; middle: 4001–6000 RMB; high:  
39  $\geq 6001$  RMB). Based on the history of cigarette smoking status, participants were  
40 categorized as follows: self-reported non-smokers (smoking less than 1 cigarette a day  
41 on average for less than 1 year), former smokers (cessation of smoking since the past  
42 6 months or more), and current smokers (smoking at least one cigarette a day for more  
43 than 1 year). Based on drinking history, participants were also categorized as follows:  
44  
45  
46  
47  
48  
49  
50  
51  
52  
53  
54  
55  
56  
57  
58  
59  
60



1  
2  
3 self-reported non-drinkers (less than once per week), former drinkers (abstinence for  
4 more than 6 months), and current drinkers (alcohol consumption at least once a week  
5 for more than 6 months). If a participant indicated an exposure to loud noise in the  
6 workplace at least once a week, then the participant was considered to experience  
7 occupational noise exposure. If the participant had been exposed to loud noise outside  
8 of work (e.g., loud music or power tools) at least once a week, then the participant  
9 was considered to be exposed to recreational noise. Self-reported medical information,  
10 mainly about hypertension, hyperlipidaemia, diabetes, and hypercholesterolemia, was  
11 also collected.  
12  
13  
14  
15  
16  
17  
18  
19  
20  
21

### 22 ***Statistical analysis***

23  
24 The study used Epidata 3.1 (The Epidata Association, Odense, Denmark) for survey  
25 data entry and check and error correction (double entry and validation). SPSS (version  
26 19.0 for Windows; SPSS, Inc., Chicago, USA) was used to conduct all statistical  
27 analyses, and the results were graphed using the SigmaPlot 12.0 software package  
28 (Systat Software International., Chicago, USA). A Kolmogorov-Smirnov normality  
29 test was performed to examine the distribution of each variable. Data were presented  
30 as proportions, mean±standard deviation (SD), or median (interquartile range),  
31 according to the original data distribution. The Student's t-test and chi square test  
32 were used to compare differences between the groups. In addition, the differences  
33 between the left and right ear were analysed using the paired t-test, and the Bonferroni  
34 correction for pairwise comparisons. Logistic regression was used to estimate the  
35 association between hearing loss and the variables (as categorical variables), after  
36 adjustment for age and gender. All reported probability values were two-tailed, and a  
37 *P* value of less than 0.05 was considered statistically significant.  
38  
39  
40  
41  
42  
43  
44  
45  
46  
47  
48  
49  
50  
51  
52  
53  
54  
55  
56  
57  
58  
59  
60

### 3. Results

#### *Comparison of hearing thresholds among different populations*

The PTA for all age groups at speech frequency and high frequency is shown in Figure 1 and Figure 2, respectively. There were significant differences between the left and right ear (when age was over 60 years,  $P<0.05$ ) with respect to PTA, both in speech frequency and high frequency, and the hearing of the right ear was better than that of the left ear.

There were significant differences between the male and female participants in the young, middle, and old group (especially at 3, 4, 6, and 8 kHz,  $P<0.05$ , data not shown) (Figure 3). In general, compared with men, women had better hearing. Table 1 and Table S1 (comprising original PTA data) show that significant differences in hearing loss were found among the three selected areas. The prevalence of hearing loss in Hangzhou was the highest (33.3% for speech-frequency, and 53.9% for high-frequency hearing loss). Moreover, Figure 4 shows the PTA at the examined frequencies (0.125 to 8 kHz) among men and women in the different age groups. There were significant differences among age groups for both ears ( $P<0.05$ ) at all frequencies. PTA was the highest in the old group, and lowest in the young group.

Table 1. Hearing loss in different areas.

|           | Speech-frequency hearing loss $\geq 26$ dB |                |                | High-frequency hearing loss $\geq 26$ dB |                |                |
|-----------|--------------------------------------------|----------------|----------------|------------------------------------------|----------------|----------------|
|           | Total, %                                   | Male, %        | Female, %      | Total, %                                 | Male, %        | Female, %      |
| Jiangshan | 24.4 (304/1247)                            | 30.2 (209/691) | 17.1 (95/556)  | 39.0 (486/1247)                          | 48.8 (337/691) | 26.8 (149/556) |
| Jiaxing   | 24.8 (277/1088)                            | 29.1 (155/533) | 20.7 (115/555) | 33.2 (361/1088)                          | 36.6 (195/533) | 29.9 (166/555) |
| Hangzhou  | 33.3 (472/1419)                            | 34.9 (236/676) | 31.8 (236/743) | 53.9 (765/1419)                          | 58.7 (397/676) | 49.5 (368/743) |
| <i>P</i>  | <0.001                                     | 0.061          | <0.001         | <0.001                                   | <0.001         | <0.001         |

### ***The correlation between hearing loss and covariates***

Of the 3754 eligible participants, a total of 1046 (27.9%) had speech-frequency hearing loss, and 1612 (42.9%) had high-frequency hearing loss. Table 2 shows the results of the comparison of the sociodemographic characteristics of the participants affected by hearing loss at speech-frequency and high-frequency. Participants with hearing loss group were on average 17 years older than those without hearing loss. Furthermore, there was a higher proportion of men in the hearing-loss group than in the normal-hearing group (speech-frequency, 57.4% versus 48.0%,  $P<0.001$ ; high-frequency, 57.6% versus 45.3%,  $P<0.001$ ). In addition, education, personal income, noise exposure, smoking status, and drinking status were significantly associated with both types of hearing loss (all  $P<0.001$ ). As for medical covariate data, there was a significant correlation between hearing loss and presence of hypertension, hyperlipidaemia, diabetes, and hypercholesterolemia (all  $P<0.001$ , for speech-frequency and high-frequency hearing loss).

Table 2. Characteristics of study participants

|                                 | Speech-frequency hearing loss $\geq 26$ dB |                |          | High-frequency hearing loss $\geq 26$ dB |                |          |
|---------------------------------|--------------------------------------------|----------------|----------|------------------------------------------|----------------|----------|
|                                 | No                                         | Yes            | <i>P</i> | No                                       | Yes            | <i>P</i> |
| Number                          | 2708                                       | 1046           |          | 2142                                     | 1612           |          |
| Age, years                      | 45.28±13.56                                | 61.97±12.38    | <0.001   | 42.83±12.92                              | 59.37±12.68    | <0.001   |
| Gender, % (men)                 | 48.0                                       | 57.4           | <0.001   | 45.3                                     | 57.6           | <0.001   |
| Education, %                    |                                            |                |          |                                          |                |          |
| ≤ Elementary school             | 7.2                                        | 23.9           |          | 5.5                                      | 20.3           |          |
| Middle school                   | 20.6                                       | 28.9           |          | 17.5                                     | 30.1           |          |
| High school                     | 27.4                                       | 26.5           |          | 28.0                                     | 26.0           |          |
| ≥ College                       | 44.8                                       | 20.7           | <0.001   | 49.1                                     | 23.5           | <0.001   |
| Income: low/middle/high, %      | 37.1/44.7/18.2                             | 55.2/32.2/12.6 | <0.001   | 34.9/46.9/18.2                           | 51.7/33.7/14.6 | <0.001   |
| Smoking: non/former/current, %  | 79.0/4.6/16.4                              | 62.2/11.8/26.0 | <0.001   | 83.1/3.5/13.4                            | 62.6/10.7/26.7 | <0.001   |
| Drinking: non/former/current, % | 83.9/1.4/14.7                              | 69.1/2.6/28.3  | <0.001   | 86.5/1.4/12.1                            | 70.9/2.1/27.0  | <0.001   |
| Occupational noise exposure, %  | 36.5                                       | 46.7           | <0.001   | 35.7                                     | 44.2           | <0.001   |
| Recreational noise exposure, %  | 21.4                                       | 31.3           | <0.001   | 20.5                                     | 28.9           | <0.001   |
| Hypertension, %                 | 13.7                                       | 43.7           | <0.001   | 10.2                                     | 37.8           | <0.001   |
| Hyperlipidemia, %               | 4.9                                        | 13.6           | <0.001   | 3.3                                      | 12.7           | <0.001   |
| Diabetes, %                     | 3.2                                        | 12.4           | <0.001   | 1.8                                      | 11.0           | <0.001   |
| Hypercholesterolemia, %         | 2.0                                        | 5.2            | <0.001   | 1.7                                      | 4.4            | <0.001   |

1  
2  
3 After adjustment for age and gender, a logistic regression analysis was performed  
4  
5 to estimate the correlation between hearing loss and independent variables (Table 3).  
6  
7 Education was associated with speech-frequency hearing loss with borderline  
8  
9 significance ( $P=0.064$ ). High personal income was found to have a significant  
10  
11 negative correlation with hearing loss (odds ratio [OR]=0.69, 95% confidence  
12  
13 intervals [CI]: 0.52–0.92,  $P=0.025$ ). The adjusted ORs for the comparison of current  
14  
15 smokers and non-smokers and current drinkers and non-drinkers were 1.43 (95% CI:  
16  
17 1.11–1.85) ( $P$  for trend=0.007) and 1.44 (95% CI: 1.15–1.82) ( $P$  for trend=0.004),  
18  
19 respectively. The results showed that both types of noise exposures were risk factors  
20  
21 for hearing loss. As for common chronic diseases, no significant association was  
22  
23 found between presence of hyperlipidaemia or hypercholesterolemia and hearing loss  
24  
25 (for hyperlipidaemia, OR=1.03, 95% CI: 0.75–1.41,  $P=0.848$ ; for  
26  
27 hypercholesterolemia, OR=1.31, 95% CI: 0.81–2.12,  $P=0.275$ ). Hearing loss was  
28  
29 associated with diabetes with borderline significance (OR=1.39, 95% CI: 0.99–1.95,  
30  
31  $P=0.061$ ), and hypertension was found to be significantly associated with hearing loss  
32  
33 (OR=2.28, 95% CI: 1.87–2.79,  $P<0.001$ ).  
34  
35  
36

37 Moreover, smoking, drinking, occupational noise, recreational noise, hypertension,  
38  
39 and diabetes were risk factors for high-frequency hearing loss, whereas a high  
40  
41 education level was a protective factor. In contrast with speech-frequency hearing loss,  
42  
43 hyperlipidaemia was positively associated with hearing loss (OR=1.45, 95% CI: 1.02–  
44  
45 2.07,  $P=0.039$ ), while no significant association was found between income and  
46  
47 hearing loss. The effects of smoking and hypertension on hearing loss were the  
48  
49 greatest (for smoking, OR=2.08, 95% CI: 1.63–2.65; for hypertension, OR=2.17, 95%  
50  
51 CI: 1.76–2.68).  
52  
53  
54  
55  
56  
57  
58  
59  
60

Table 3. Logistic regression analysis of all the correlations of hearing loss

|                          | Speech-frequency hearing loss $\geq 26$ dB |                  |                 | High-frequency hearing loss $\geq 26$ dB |                  |                 |
|--------------------------|--------------------------------------------|------------------|-----------------|------------------------------------------|------------------|-----------------|
|                          | Yes/Total                                  | ORs (95% CIs)    | <i>P</i> -trend | Yes/Total                                | OR (95% CI)      | <i>P</i> -trend |
| Education                |                                            |                  |                 |                                          |                  |                 |
| $\leq$ Elementary school | 250/445                                    | 1 (Reference)    |                 | 328/445                                  | 1 (Reference)    |                 |
| Middle school            | 302/860                                    | 0.75 (0.57-0.98) |                 | 486/860                                  | 0.93 (0.70-1.25) |                 |
| High school              | 277/1018                                   | 0.73 (0.55-0.97) |                 | 419/1018                                 | 0.65 (0.48-0.87) |                 |
| $\geq$ College           | 217/1431                                   | 0.66 (0.48-0.90) | 0.064           | 379/1431                                 | 0.60 (0.43-0.82) | <0.001          |
| Income                   |                                            |                  |                 |                                          |                  |                 |
| Low                      | 577/1581                                   | 1 (Reference)    |                 | 834/1581                                 | 1 (Reference)    |                 |
| Middle                   | 337/1547                                   | 0.80 (0.65-0.99) |                 | 543/1547                                 | 0.82 (0.67-0.99) |                 |
| High                     | 132/626                                    | 0.69 (0.52-0.92) | 0.025           | 235/626                                  | 0.89 (0.69-1.16) | 0.129           |
| Smoking                  |                                            |                  |                 |                                          |                  |                 |
| non-                     | 651/2789                                   | 1 (Reference)    |                 | 1009/2789                                | 1 (Reference)    |                 |
| former-                  | 123/248                                    | 1.50 (1.07-2.11) |                 | 173/248                                  | 1.85 (1.30-2.64) |                 |
| current-                 | 272/717                                    | 1.43 (1.11-1.85) | 0.007           | 430/717                                  | 2.08 (1.63-2.65) | <0.001          |
| Drinking                 |                                            |                  |                 |                                          |                  |                 |
| non-                     | 723/2995                                   | 1 (Reference)    |                 | 1143/2995                                | 1 (Reference)    |                 |
| former-                  | 27/65                                      | 1.64 (0.87-3.09) |                 | 34/65                                    | 1.13 (0.60-2.13) |                 |
| current-                 | 296/694                                    | 1.44 (1.15-1.82) | 0.004           | 435/694                                  | 1.38 (1.10-1.74) | 0.022           |
| Occupational noise       |                                            |                  |                 |                                          |                  |                 |
| no                       | 557/2277                                   | 1 (Reference)    |                 | 899/2277                                 | 1 (Reference)    |                 |
| yes                      | 489/1477                                   | 1.35 (1.12-1.62) | 0.001           | 713/1477                                 | 1.29 (1.08-1.54) | 0.004           |
| Recreational noise       |                                            |                  |                 |                                          |                  |                 |
| no                       | 719/2848                                   | 1 (Reference)    |                 | 1134/2825                                | 1 (Reference)    |                 |
| yes                      | 327/906                                    | 1.39 (1.13-1.70) | 0.002           | 461/896                                  | 1.39 (1.14-1.70) | 0.001           |
| Hypertension             |                                            |                  |                 |                                          |                  |                 |
| no                       | 589/2926                                   | 1 (Reference)    |                 | 1003/2926                                | 1 (Reference)    |                 |
| yes                      | 457/828                                    | 2.28 (1.87-2.79) | <0.001          | 609/828                                  | 2.17 (1.76-2.68) | <0.001          |

|    |                      |          |                  |       |           |                        |
|----|----------------------|----------|------------------|-------|-----------|------------------------|
| 1  |                      |          |                  |       |           |                        |
| 2  |                      |          |                  |       |           |                        |
| 3  |                      |          |                  |       |           |                        |
| 4  |                      |          |                  |       |           |                        |
| 5  |                      |          |                  |       |           |                        |
| 6  |                      |          |                  |       |           |                        |
| 7  | Hyperlipidemia       |          |                  |       |           |                        |
| 8  | no                   | 904/3479 | 1 (Reference)    |       | 1407/3479 | 1 (Reference)          |
| 9  | yes                  | 142/275  | 1.03 (0.75-1.41) | 0.848 | 205/275   | 1.45 (1.02-2.07) 0.039 |
| 10 | Diabetes             |          |                  |       |           |                        |
| 11 | no                   | 916/3538 | 1 (Reference)    |       | 1435/3538 | 1 (Reference)          |
| 12 | yes                  | 130/216  | 1.39 (0.99-1.95) | 0.061 | 177/216   | 1.82 (1.21-2.75) 0.004 |
| 13 | Hypercholesterolemia |          |                  |       |           |                        |
| 14 | no                   | 992/3647 | 1 (Reference)    |       | 1541/3647 | 1 (Reference)          |
| 15 | yes                  | 54/107   | 1.31 (0.81-2.12) | 0.275 | 71/107    | 1.01 (0.60-1.69) 0.983 |

Note: analysis were adjusted for gender and age. Age was represented by categorical variables.



#### 4. Discussion

This cross-sectional study, conducted in a large population and based on a cohort of local individuals in the Zhejiang province, provides information about the hearing threshold levels and prevalence of hearing loss among the people in Zhejiang, China. Based on the standard definition (a PTA of  $\geq 26$  dB in the better ear), we estimated that 27.9% of the participants had speech-frequency hearing loss, which is far lower than the prevalence reported in other Chinese studies i.e., those conducted by Bu<sup>15</sup> and Gong<sup>6</sup> (59.93% and 58.85%). The difference probably resulted from the geographic distribution of the population surveyed. Consistent with other studies<sup>5, 16, 17</sup>, women often had a lower PTA than men, at most frequencies (from 1 to 8 kHz), in both the left and right ear. Among these examined frequencies, significant differences were found between the young, middle and old groups for PTA ( $P < 0.001$ ), suggesting that the hearing threshold increases with age, both in males and females.<sup>18</sup> Furthermore, Sommer reported that a 1-year increase in age would raise the risk of hearing loss by 15%.<sup>14</sup>

Right ear dominance for PTA was identified in this study. Especially in participants older than 60 years, the right ear had better hearing ability than the left, which can be explained from the perspective of neurology. The ascending auditory projections pass through the brainstem and end in the cerebral cortex of the ipsi- and contra-lateral hemispheres, with a predominant representation on the side opposite to the ear.<sup>19</sup> In brief, the sound collected through the right ear is formed in the left hemisphere, and vice versa. Therefore, based on the anatomical characteristics of the human brain, right ear input is directly transferred to the speech perception areas in the left hemisphere, whereas stimuli to the left ear have to be transferred initially to the right hemisphere, from which it is transferred to the left hemisphere through the corpus

1  
2  
3 callosum.<sup>19</sup> Some studies have also identified the right ear dominance in certain  
4 populations,<sup>20-22</sup> which in turn, supports the above theoretical basis. In contrast,  
5 another study in Switzerland suggested that PTA has no significant differences  
6 between both ears.<sup>23</sup>  
7  
8  
9

10  
11 Hangzhou had the highest prevalence of hearing loss among the three selected  
12 areas. As a modern city with a highly developed economy, Hangzhou is filled with  
13 industrial noise, whereas the other two regions have a slightly less-developed  
14 economy, with less industrial noise. This is similar to inferences made by Wang et al.<sup>5</sup>  
15 Meanwhile, consistent with previous studies, noise exposures (including occupational  
16 noise and recreational noise) were found to be risk factors for hearing loss,<sup>6, 24, 25</sup>  
17 while education and personal income were protective factors. Highly educated people  
18 have a better knowledge of health, and people with high personal income can prevent  
19 hearing loss by using low-noise devices or by avoiding high-noise workplaces.  
20  
21  
22  
23  
24  
25  
26  
27  
28  
29  
30

31 Our results support the evidence that smoking and drinking have associations with  
32 the risk of hearing loss.<sup>26, 27</sup> Cruickshanks et al.<sup>28</sup> estimated that current smokers were  
33 1.69 times more likely to have hearing loss than non-smokers (95% CI: 1.31–2.17),  
34 which is similar to the results obtained in our study (1.66-fold, 95% CI: 1.24–2.22).  
35 Similarly, a multi-centre study conducted by Fransen et al.<sup>29</sup> reported that smoking  
36 significantly increased high-frequency hearing loss in a dose-dependent fashion.  
37  
38  
39  
40  
41  
42  
43

44 Among the factors evaluated in the present study, hypertension had the strongest  
45 effect. The risk of hearing loss was 2 times higher in people with hypertension than in  
46 those without hypertension. Similar results were also found in other studies.<sup>30, 31</sup> Our  
47 study only found borderline association between diabetes and hearing loss, similar to  
48 the equivocal results from other studies.<sup>32, 33</sup> A likely explanation for these  
49 inconsistent results is that hearing loss is only weakly associated with diabetes, whose  
50  
51  
52  
53  
54  
55  
56  
57  
58  
59  
60

1  
2  
3 effects may be masked by other strong factors (e.g. age<sup>6</sup>). Another explanation is that  
4  
5 the number of participants with diabetes is small in this study.  
6

7 The limitations of this study should be considered. First, owing to the  
8  
9 cross-sectional study nature, a causal relationship could not be established. Second,  
10  
11 medical covariates were collected based on self-reported diagnosis, and specific  
12  
13 values were not analysed as these data were not collected completely. Third, similar to  
14  
15 the study conducted by Choi<sup>34</sup>, we cannot rule out potential residual confounding by  
16  
17 the presence of a noisy environment that were not captured by the binary variables of  
18  
19 occupational and recreational noise.  
20  
21

22 In conclusion, the differences based on age and gender in hearing threshold levels  
23  
24 and hearing loss were identified. Older men living in modern cities filled with  
25  
26 industrial noise should pay more attention to their hearing status. We found a right ear  
27  
28 dominance throughout all audiometric parameters. Harmful habits, like smoking and  
29  
30 drinking, and ambient noise (including occupational and recreational noise) are  
31  
32 associated with hearing loss. Educating and advising individuals to maintain good  
33  
34 general health and fitness would have benefits for hearing preservation.<sup>26</sup> Furthermore,  
35  
36 we found evidence that hypertension may accelerate the occurrence of hearing loss  
37  
38 via a different pathophysiological mechanism. Hearing loss is a multifactorial  
39  
40 condition that is a result of multiple intrinsic and extrinsic factors acting on the ears,  
41  
42 and further prospective studies, with a multi-centre approach and wider ranges of  
43  
44 exposure, are required to confirm the related risk factors.  
45  
46  
47

48 We hope that our data can provide information on hearing loss for the development  
49  
50 of national public health policies, and can help identify some related factors for early  
51  
52 intervention. Evidently, our country attaches lesser importance to hearing loss than  
53  
54 other developed countries, and we simultaneously hope to arouse the government's  
55  
56  
57

1  
2  
3 attention to this condition.  
4  
5  
6  
7  
8

9 **Author Contributors** DW and HZ are joint first authors. DW edited the article,  
10  
11 oversaw data analysis and preparation of supplementary files. HZ conducted the  
12  
13 statistical analysis, interpretation and drafted the article. HM and LZ contributed to  
14  
15 collecting prevalence estimates and preparation of supplementary files. LY and LX  
16  
17 originated the study and designed the analysis, and both of them are coinvestigators  
18  
19 and approved the final version of the article.  
20  
21

22 **Funding** This work was supported by the Zhejiang Key Research and Development  
23  
24 Program (grant number 2015C03050), and the Major Science and Technology  
25  
26 Innovation Project of Hangzhou (grant number 20152013A01).  
27  
28

29 **Competing interests** All authors have completed the ICMJE uniform disclosure  
30  
31 form at [http://www.icmje.org/coi\\_disclosure.pdf](http://www.icmje.org/coi_disclosure.pdf) and declare: Lei Yang and  
32  
33 Liang-Wen Xu had financial support from the Zhejiang Key Research and  
34  
35 Development Program and the Major Science and Technology Innovation Project of  
36  
37 Hangzhou for the submitted work; no financial relationships with any organisations  
38  
39 that might have an interest in the submitted work in the previous 3 years; no other  
40  
41 relationships or activities that could appear to have influenced the submitted work.  
42  
43

44 **Ethics approval** The study was approved by the Hangzhou Normal University  
45  
46 ethics committee.  
47

48 **Data sharing statement** No additional data are available.  
49  
50  
51  
52  
53  
54  
55  
56  
57

## References

1. Bowl MR, MM Simon, NJ Ingham, *et al.* A large scale hearing loss screen reveals an extensive unexplored genetic landscape for auditory dysfunction. *Nat Commun.* 2017; **8**(1):886.
2. Olusanya BO, KJ Neumann, JE Saunders. The global burden of disabling hearing impairment: a call to action. *Bull World Health Organ.* 2014; **92**(5):367-373.
3. Schiller JS, JW Lucas, BW Ward, *et al.* Summary health statistics for U.S. adults: National Health Interview Survey, 2010. *Vital Health Stat 10.* 2012(252):1-207.
4. Twardella D, C Perez-Alvarez, T Steffens, *et al.* The prevalence of audiometric notches in adolescents in Germany: The Ohrkan-study. *Noise Health.* 2013; **15**(67):412-419.
5. Wang JG, XY Qian, J Chen, *et al.* A Cross-Sectional Study on the Hearing Threshold Levels Among People in Qinling, Qinghai, and Nanjing, China. *American Journal of Audiology.* 2018; **27**(1):147-155.
6. Gong R, XY Hu, C Gong, *et al.* Hearing loss prevalence and risk factors among older adults in China. *International Journal Of Audiology.* 2018; **57**(5):354-359.
7. Dalton DS, KJ Cruickshanks, BE Klein, *et al.* The impact of hearing loss on quality of life in older adults. *Gerontologist.* 2003; **43**(5):661-668.
8. GBD. Global, regional, and national incidence, prevalence, and years lived with disability for 328 diseases and injuries for 195 countries, 1990-2016: a systematic analysis for the Global Burden of Disease Study 2016. *Lancet.* 2017; **390**(10100):1211-1259.
9. Agrawal Y, EA Platz, JK Niparko. Prevalence of hearing loss and differences by demographic characteristics among US adults: data from the National Health and

- 1  
2  
3 Nutrition Examination Survey, 1999-2004. *Arch Intern Med.* 2008;  
4  
5 **168**(14):1522-1530.  
6  
7 10. Helzner EP, JA Cauley, SR Pratt, *et al.* Race and sex differences in age-related  
8  
9 hearing loss: the Health, Aging and Body Composition Study. *J Am Geriatr Soc.*  
10  
11 2005; **53**(12):2119-2127.  
12  
13 11. Truelsen T, S Begg, C Mathers. The global burden of cerebrovascular. *WHO Int.*  
14  
15 2006.  
16  
17 12. Choi YH, H Hu, S Tak, *et al.* Occupational noise exposure assessment using  
18  
19 O\*NET and its application to a study of hearing loss in the US general population.  
20  
21 *Occup Environ Med.* 2012; **69**(3):176-183.  
22  
23 13. Vaughan G. *Deafness and hearing loss.* 2018; Available from:  
24  
25 <http://www.who.int/news-room/fact-sheets/detail/deafness-and-hearing-loss>.  
26  
27  
28 14. Sommer J, CG Brenann-Jones, RH Eikelboom, *et al.* A population-based study of  
29  
30 the association between dysglycaemia and hearing loss in middle age. *Diabetic*  
31  
32 *Medicine.* 2017; **34**(5):683-690.  
33  
34 15. Bu X, C Liu, G Xing, *et al.* WHO Ear and Hearing Disorders Survey in four  
35  
36 provinces in China. *Audiological Medicine.* 2011; **9**(4):141-146.  
37  
38 16. Brant LJ, S Gordon-Salant, JD Pearson, *et al.* Risk factors related to  
39  
40 age-associated hearing loss in the speech frequencies. *J Am Acad Audiol.* 1996;  
41  
42 **7**(3):152-160.  
43  
44 17. Kim JS. Prevalence and Factors Associated With Hearing Loss and Hearing Aid  
45  
46 Use in Korean Elders. *Iranian Journal Of Public Health.* 2015; **44**(3):308-317.  
47  
48 18. Liu H, H Luo, T Yang, *et al.* Association of leukocyte telomere length and the  
49  
50 risk of age-related hearing impairment in Chinese Hans. *Sci Rep.* 2017;  
51  
52 **7**(1):10106.  
53  
54  
55  
56  
57  
58  
59  
60

19. Westerhausen R, K Hugdahl. The corpus callosum in dichotic listening studies of hemispheric asymmetry: a review of clinical and experimental evidence. *Neurosci Biobehav Rev.* 2008; **32**(5):1044-1054.
20. Budenz CL, MK Cosetti, DH Coelho, *et al.* The effects of cochlear implantation on speech perception in older adults. *J Am Geriatr Soc.* 2011; **59**(3):446-453.
21. Keefe DH, MP Gorga, W Jesteadt, *et al.* Ear asymmetries in middle-ear, cochlear, and brainstem responses in human infants. *J Acoust Soc Am.* 2008; **123**(3):1504-1512.
22. Sharpe RA, EL Camposeo, WK Muzaffar, *et al.* Effects of Age and Implanted Ear on Speech Recognition in Adults with Unilateral Cochlear Implants. *Audiol Neurootol.* 2016; **21**(4):223-230.
23. Wettstein VG, R Probst. Right Ear Advantage of Speech Audiometry in Single-sided Deafness. *Otol Neurotol.* 2018; **39**(4):417-421.
24. Degeest S, E Clays, P Corthals, *et al.* Epidemiology and Risk Factors for Leisure Noise-Induced Hearing Damage in Flemish Young Adults. *Noise Health.* 2017; **19**(86):10-19.
25. Smalt CJ, J Lacirignola, SK Davis, *et al.* Noise dosimetry for tactical environments. *Hear Res.* 2017; **349**:42-54.
26. Lin YY, LW Wu, TW Kao, *et al.* Secondhand Smoke is Associated with Hearing Threshold Shifts in Obese Adults. *Scientific Reports.* 2016; **6**.
27. Shimokata H. Why are individual differences in the hearing ability so great in the elderly? Relationship of hearing with systemic aging.: Relationship of hearing with systemic aging. *Audiology.* 2010; **51**(3):177-184.
28. Cruickshanks KJ, R Klein, BE Klein, *et al.* Cigarette smoking and hearing loss: the epidemiology of hearing loss study. *JAMA.* 1998; **279**(21):1715-1719.

- 1  
2  
3 29. Fransen E, V Topsakal, JJ Hendrickx, *et al.* Occupational noise, smoking, and a  
4 high body mass index are risk factors for age-related hearing impairment and  
5 moderate alcohol consumption is protective: A European population-based  
6 multicenter study. *Jaro-Journal Of the Association for Research In*  
7 *Otolaryngology.* 2008; **9**(3):264-276.  
8  
9  
10  
11  
12  
13 30. Fang Q, ZC Wang, Y Zhan, *et al.* Hearing loss is associated with increased CHD  
14 risk and unfavorable CHD-related biomarkers in the Dongfeng-Tongji cohort.  
15 *Atherosclerosis.* 2018; **271**:70-76.  
16  
17  
18  
19  
20 31. Ucler R, M Turan, F Garca, *et al.* The association of obesity with hearing  
21 thresholds in women aged 18-40 years. *Endocrine.* 2016; **52**(1):46-53.  
22  
23  
24 32. Jung DJ, JH Lee, T Kim, *et al.* Association Between Hearing Impairment and  
25 Albuminuria With or Without Diabetes Mellitus. *Clinical And Experimental*  
26 *Otorhinolaryngology.* 2017; **10**(3):221-227.  
27  
28  
29  
30  
31 33. Passamonti SM, F Di Berardino, P Bucciarelli, *et al.* Risk factors for idiopathic  
32 sudden sensorineural hearing loss and their association with clinical outcome.  
33 *Thrombosis Research.* 2015; **135**(3):508-512.  
34  
35  
36  
37 34. Choi YH,SK Park. Environmental Exposures to Lead, Mercury, and Cadmium  
38 and Hearing Loss in Adults and Adolescents: KNHANES 2010-2012. *Environ*  
39 *Health Perspect.* 2017; **125**(6):067003.  
40  
41  
42  
43  
44  
45  
46  
47  
48  
49  
50  
51  
52  
53  
54  
55  
56  
57  
58  
59  
60



## Figure legends

### **Figure 1. Pure-tone average for all ages at speech frequencies (0.5, 1, 2 and 4kHz)**

(A: total participants; B: males participants; C: female participants). The full lines indicate the hearing thresholds of left ears, and the dotted lines indicate the hearing thresholds of right ears. Bars indicate  $\pm 1$  SD. '20y' old represents people aged 18-25y old, '30y' old represent people aged 26-35y old, '40y' old range is 36-45y old, '50y' old range is 46-55y old, '60y' old range is 56-65y old, '70y' old range is 66-75y old, '80y' old range is 76-85y old, and '90y' old range is 86-98y old.

### **Figure 2. Pure-tone average for all ages at high frequencies (3, 4, 6 and 8kHz)**

(A: total participants; B: males participants; C: female participants). The full lines indicate the hearing thresholds of left ears, and the dotted lines indicate the hearing thresholds of right ears. Bars indicate  $\pm 1$  SD. '20y' old represents people aged 18-25y old, '30y' old represent people aged 26-35y old, '40y' old range is 36-45y old, '50y' old range is 46-55y old, '60y' old range is 56-65y old, '70y' old range is 66-75y old, '80y' old range is 76-85y old, and '90y' old range is 86-98y old.

### **Figure 3. Pure-tone average of different age groups**

(A: total participants; B: male participants; C: female participants). The left parts of the figures indicate the PTA of the left ears, and the right parts indicate the PTA of the right ears.

### **Figure 4. Pure-tone average of different genders**

(A: young group; B: middle group; C: old group). The left parts of the figures indicate the PTA of the left ears, and the right parts indicate the PTA of the right ears.

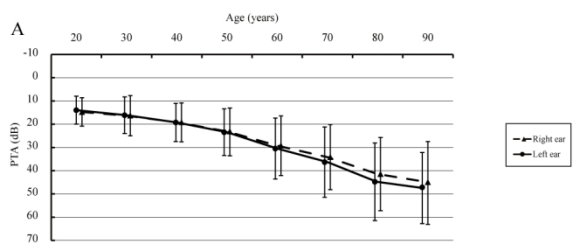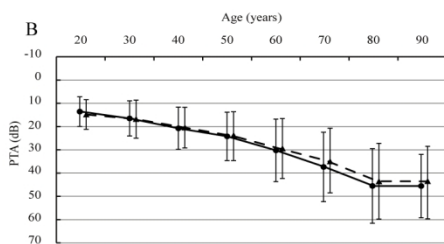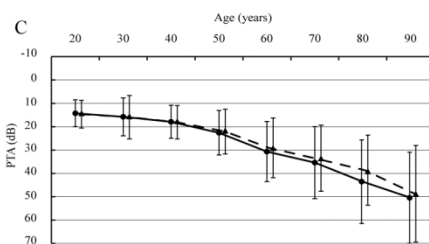

1

146x85mm (300 x 300 DPI)

1  
2  
3  
4  
5  
6  
7  
8  
9  
10  
11  
12  
13  
14  
15  
16  
17  
18  
19  
20  
21  
22  
23  
24  
25  
26  
27  
28  
29  
30  
31  
32  
33  
34  
35  
36  
37  
38  
39  
40  
41  
42  
43  
44  
45  
46  
47  
48  
49  
50  
51  
52  
53  
54  
55  
56  
57  
58  
59  
60

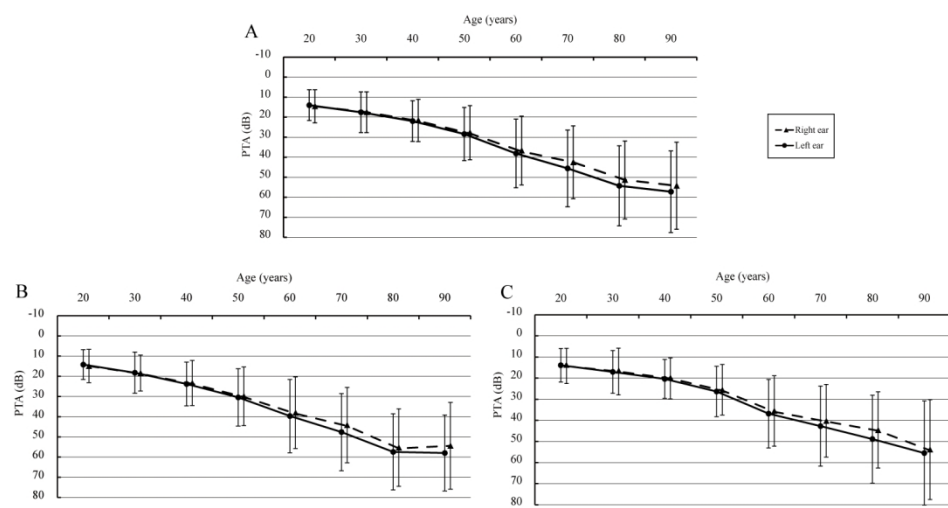

2

141x80mm (300 x 300 DPI)

1  
2  
3  
4  
5  
6  
7  
8  
9  
10  
11  
12  
13  
14  
15  
16  
17  
18  
19  
20  
21  
22  
23  
24  
25  
26  
27  
28  
29  
30  
31  
32  
33  
34  
35  
36  
37  
38  
39  
40  
41  
42  
43  
44  
45  
46  
47  
48  
49  
50  
51  
52  
53  
54  
55  
56  
57  
58  
59  
60

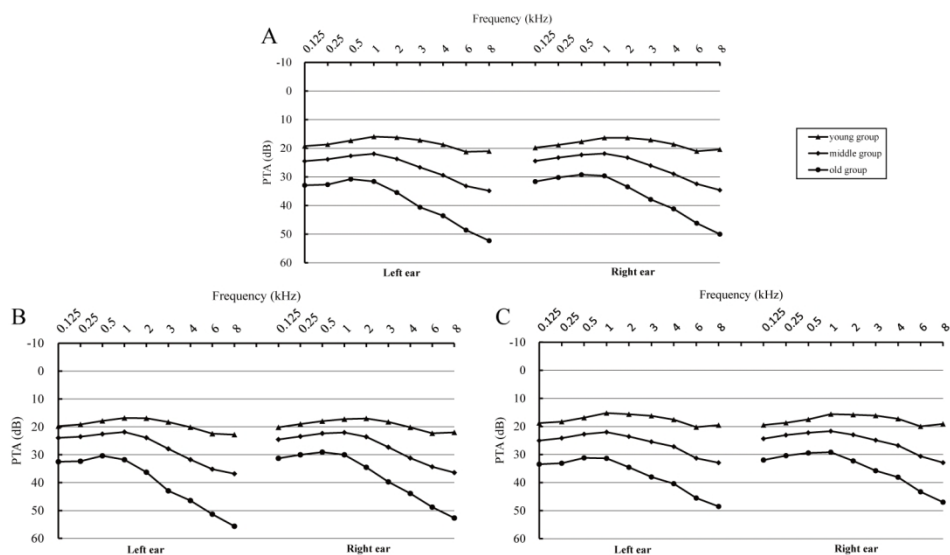

3

139x85mm (300 x 300 DPI)

1  
2  
3  
4  
5  
6  
7  
8  
9  
10  
11  
12  
13  
14  
15  
16  
17  
18  
19  
20  
21  
22  
23  
24  
25  
26  
27  
28  
29  
30  
31  
32  
33  
34  
35  
36  
37  
38  
39  
40  
41  
42  
43  
44  
45  
46  
47  
48  
49  
50  
51  
52  
53  
54  
55  
56  
57  
58  
59  
60

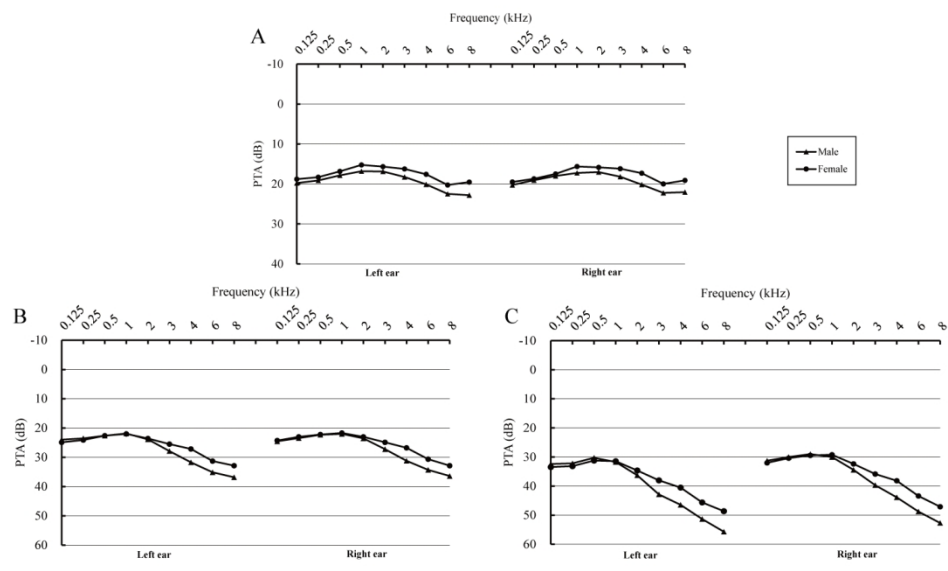

4

137x82mm (300 x 300 DPI)

Supplement Table 1. Differences in PTA (dB) in the better ear among areas.

|           | Speech-frequency hearing loss $\geq 26$ dB |             |             | High-frequency hearing loss $\geq 26$ dB |             |             |
|-----------|--------------------------------------------|-------------|-------------|------------------------------------------|-------------|-------------|
|           | Total                                      | Male        | Female      | Total                                    | Male        | Female      |
| Jiangshan | 22.25±11.56                                | 23.61±12.23 | 20.10±10.34 | 27.23±16.86                              | 30.79±18.10 | 22.82±13.98 |
| Jiaxing   | 21.23±9.91                                 | 22.39±10.02 | 20.11±9.68  | 23.09±12.09                              | 24.33±12.10 | 21.90±11.98 |
| Hangzhou  | 22.57±12.18                                | 23.41±12.45 | 21.81±11.89 | 30.25±17.45                              | 32.40±18.38 | 28.29±16.32 |
| <i>P</i>  | 0.013                                      | 0.163       | 0.004       | <0.001                                   | <0.001      | <0.001      |

# Reporting checklist for cross sectional study.

Based on the STROBE cross sectional guidelines.

## Instructions to authors

Complete this checklist by entering the page numbers from your manuscript where readers will find each of the items listed below.

Your article may not currently address all the items on the checklist. Please modify your text to include the missing information. If you are certain that an item does not apply, please write "n/a" and provide a short explanation.

Upload your completed checklist as an extra file when you submit to a journal.

In your methods section, say that you used the STROBE cross sectional reporting guidelines, and cite them as:

von Elm E, Altman DG, Egger M, Pocock SJ, Gotsche PC, Vandenbroucke JP. The Strengthening the Reporting of Observational Studies in Epidemiology (STROBE) Statement: guidelines for reporting observational studies.

|                        |     | Reporting Item                                                                                                                  | Page Number |
|------------------------|-----|---------------------------------------------------------------------------------------------------------------------------------|-------------|
| Title                  | #1a | Indicate the study's design with a commonly used term in the title or the abstract                                              | 1           |
| Abstract               | #1b | Provide in the abstract an informative and balanced summary of what was done and what was found                                 | 2           |
| Background / rationale | #2  | Explain the scientific background and rationale for the investigation being reported                                            | 2           |
| Objectives             | #3  | State specific objectives, including any prespecified hypotheses                                                                | 2           |
| Study design           | #4  | Present key elements of study design early in the paper                                                                         | 2           |
| Setting                | #5  | Describe the setting, locations, and relevant dates, including periods of recruitment, exposure, follow-up, and data collection | 5           |
| Eligibility criteria   | #6a | Give the eligibility criteria, and the sources and methods of selection of participants.                                        | 5           |

|    |                  |      |                                                                   |     |
|----|------------------|------|-------------------------------------------------------------------|-----|
| 1  |                  | #7   | Clearly define all outcomes, exposures, predictors, potential     | 6   |
| 2  |                  |      | confounders, and effect modifiers. Give diagnostic criteria, if   |     |
| 3  |                  |      | applicable                                                        |     |
| 4  |                  |      |                                                                   |     |
| 5  |                  |      |                                                                   |     |
| 6  | Data sources /   | #8   | For each variable of interest give sources of data and details of | 6   |
| 7  | measurement      |      | methods of assessment (measurement). Describe                     |     |
| 8  |                  |      | comparability of assessment methods if there is more than one     |     |
| 9  |                  |      | group. Give information separately for for exposed and            |     |
| 10 |                  |      | unexposed groups if applicable.                                   |     |
| 11 |                  |      |                                                                   |     |
| 12 |                  |      |                                                                   |     |
| 13 |                  |      |                                                                   |     |
| 14 | Bias             | #9   | Describe any efforts to address potential sources of bias         | 6   |
| 15 |                  |      |                                                                   |     |
| 16 |                  |      |                                                                   |     |
| 17 | Study size       | #10  | Explain how the study size was arrived at                         | 6   |
| 18 |                  |      |                                                                   |     |
| 19 | Quantitative     | #11  | Explain how quantitative variables were handled in the            | 6   |
| 20 | variables        |      | analyses. If applicable, describe which groupings were chosen,    |     |
| 21 |                  |      | and why                                                           |     |
| 22 |                  |      |                                                                   |     |
| 23 |                  |      |                                                                   |     |
| 24 | Statistical      | #12a | Describe all statistical methods, including those used to control | 7   |
| 25 | methods          |      | for confounding                                                   |     |
| 26 |                  |      |                                                                   |     |
| 27 |                  |      |                                                                   |     |
| 28 |                  | #12b | Describe any methods used to examine subgroups and                | 7   |
| 29 |                  |      | interactions                                                      |     |
| 30 |                  |      |                                                                   |     |
| 31 |                  |      |                                                                   |     |
| 32 |                  | #12c | Explain how missing data were addressed                           | 7   |
| 33 |                  |      |                                                                   |     |
| 34 |                  |      |                                                                   |     |
| 35 |                  | #12d | If applicable, describe analytical methods taking account of      | n/a |
| 36 |                  |      | sampling strategy                                                 |     |
| 37 |                  |      |                                                                   |     |
| 38 |                  |      |                                                                   |     |
| 39 |                  | #12e | Describe any sensitivity analyses                                 | n/a |
| 40 |                  |      |                                                                   |     |
| 41 | Participants     | #13a | Report numbers of individuals at each stage of study—eg           | 8   |
| 42 |                  |      | numbers potentially eligible, examined for eligibility, confirmed |     |
| 43 |                  |      | eligible, included in the study, completing follow-up, and        |     |
| 44 |                  |      | analysed. Give information separately for for exposed and         |     |
| 45 |                  |      | unexposed groups if applicable.                                   |     |
| 46 |                  |      |                                                                   |     |
| 47 |                  |      |                                                                   |     |
| 48 |                  |      |                                                                   |     |
| 49 |                  | #13b | Give reasons for non-participation at each stage                  | n/a |
| 50 |                  |      |                                                                   |     |
| 51 |                  | #13c | Consider use of a flow diagram                                    | n/a |
| 52 |                  |      |                                                                   |     |
| 53 |                  |      |                                                                   |     |
| 54 | Descriptive data | #14a | Give characteristics of study participants (eg demographic,       | 8   |
| 55 |                  |      | clinical, social) and information on exposures and potential      |     |
| 56 |                  |      | confounders. Give information separately for exposed and          |     |
| 57 |                  |      | unexposed groups if applicable.                                   |     |
| 58 |                  |      |                                                                   |     |
| 59 |                  |      |                                                                   |     |
| 60 |                  |      |                                                                   |     |



|    |                  |      |                                                                      |      |
|----|------------------|------|----------------------------------------------------------------------|------|
| 1  |                  | #14b | Indicate number of participants with missing data for each           | n/a  |
| 2  |                  |      | variable of interest                                                 |      |
| 3  |                  |      |                                                                      |      |
| 4  |                  |      |                                                                      |      |
| 5  | Outcome data     | #15  | Report numbers of outcome events or summary measures.                | 8    |
| 6  |                  |      | Give information separately for exposed and unexposed                |      |
| 7  |                  |      | groups if applicable.                                                |      |
| 8  |                  |      |                                                                      |      |
| 9  |                  |      |                                                                      |      |
| 10 | Main results     | #16a | Give unadjusted estimates and, if applicable, confounder-            | 8    |
| 11 |                  |      | adjusted estimates and their precision (eg, 95% confidence           |      |
| 12 |                  |      | interval). Make clear which confounders were adjusted for and        |      |
| 13 |                  |      | why they were included                                               |      |
| 14 |                  |      |                                                                      |      |
| 15 |                  |      |                                                                      |      |
| 16 |                  |      |                                                                      |      |
| 17 |                  | #16b | Report category boundaries when continuous variables were            | 8    |
| 18 |                  |      | categorized                                                          |      |
| 19 |                  |      |                                                                      |      |
| 20 |                  |      |                                                                      |      |
| 21 |                  | #16c | If relevant, consider translating estimates of relative risk into    | n/a  |
| 22 |                  |      | absolute risk for a meaningful time period                           |      |
| 23 |                  |      |                                                                      |      |
| 24 | Other analyses   | #17  | Report other analyses done—e.g., analyses of subgroups and           | n/a  |
| 25 |                  |      | interactions, and sensitivity analyses                               |      |
| 26 |                  |      |                                                                      |      |
| 27 |                  |      |                                                                      |      |
| 28 | Key results      | #18  | Summarise key results with reference to study objectives             | 9    |
| 29 |                  |      |                                                                      |      |
| 30 |                  |      |                                                                      |      |
| 31 | Limitations      | #19  | Discuss limitations of the study, taking into account sources of     | 12   |
| 32 |                  |      | potential bias or imprecision. Discuss both direction and            |      |
| 33 |                  |      | magnitude of any potential bias.                                     |      |
| 34 |                  |      |                                                                      |      |
| 35 |                  |      |                                                                      |      |
| 36 | Interpretation   | #20  | Give a cautious overall interpretation considering objectives,       | 9-12 |
| 37 |                  |      | limitations, multiplicity of analyses, results from similar studies, |      |
| 38 |                  |      | and other relevant evidence.                                         |      |
| 39 |                  |      |                                                                      |      |
| 40 |                  |      |                                                                      |      |
| 41 | Generalisability | #21  | Discuss the generalisability (external validity) of the study        | 9-12 |
| 42 |                  |      | results                                                              |      |
| 43 |                  |      |                                                                      |      |
| 44 |                  |      |                                                                      |      |
| 45 | Funding          | #22  | Give the source of funding and the role of the funders for the       | 13   |
| 46 |                  |      | present study and, if applicable, for the original study on which    |      |
| 47 |                  |      | the present article is based                                         |      |
| 48 |                  |      |                                                                      |      |
| 49 |                  |      |                                                                      |      |

50  
51 The STROBE checklist is distributed under the terms of the Creative Commons Attribution License  
52 CC-BY. This checklist was completed on 08. October 2018 using <http://www.goodreports.org/>, a tool  
53 made by the [EQUATOR Network](#) in collaboration with [Penelope.ai](#)  
54  
55  
56  
57  
58  
59  
60

# BMJ Open

## Population-based cross-sectional study on the hearing threshold levels and hearing loss among people in Zhejiang, China

|                                 |                                                                                                                                                                                                                                                               |
|---------------------------------|---------------------------------------------------------------------------------------------------------------------------------------------------------------------------------------------------------------------------------------------------------------|
| Journal:                        | <i>BMJ Open</i>                                                                                                                                                                                                                                               |
| Manuscript ID                   | bmjopen-2018-027152.R1                                                                                                                                                                                                                                        |
| Article Type:                   | Research                                                                                                                                                                                                                                                      |
| Date Submitted by the Author:   | 16-Jan-2019                                                                                                                                                                                                                                                   |
| Complete List of Authors:       | Wang, Dahui; Hangzhou Normal University<br>Zhang, Huai; Hangzhou Normal University,<br>Ma, Haiyan; Hangzhou Normal University<br>Zhang, Long; Hangzhou Normal University<br>Yang, Lei; Hangzhou Normal University<br>Xu, Liangwen; Hangzhou Normal University |
| <b>Primary Subject Heading</b>: | Public health                                                                                                                                                                                                                                                 |
| Secondary Subject Heading:      | Epidemiology, Ear, nose and throat/otolaryngology                                                                                                                                                                                                             |
| Keywords:                       | hearing loss, hearing thresholds, lifestyle factors, environmental factors                                                                                                                                                                                    |
|                                 |                                                                                                                                                                                                                                                               |

SCHOLARONE™  
Manuscripts

1  
2  
3  
4  
5  
6  
7  
8

# Population-based cross-sectional study on the hearing threshold levels and hearing loss among people in Zhejiang, China

9 Dahui Wang <sup>\*a</sup>, Huai Zhang <sup>\*a</sup>, Haiyan Ma <sup>a</sup>, Long Zhang <sup>a</sup>, Lei Yang <sup>✉a</sup>,  
10  
11 Liangwen Xu <sup>✉a</sup>

12  
13 <sup>a</sup> The Medical School, Hangzhou Normal University, Hangzhou, Zhejiang, China.  
14  
15

16  
17  
18 \* These authors contributed equally to this work.  
19

20 **Word count:** 2912 words in Main Text; 242 words in Abstract  
21

22  
23 **Total figures:** 4 **Total tables:** 3  
24

25 <sup>✉</sup> Correspondence:  
26

27 Liangwen Xu, Hangzhou Normal University, No.58, Haishu Rd, Cangqian, Yuhang  
28 District, Hangzhou, Zhejiang, P.R. China, tel: +86 18857717938, fax: +86-571-  
29 28865000, e-mail: [tougaoscihz@163.com](mailto:tougaoscihz@163.com)  
30  
31

32  
33  
34  
35  
36 Lei Yang, Hangzhou Normal University, Zhejiang, P.R. China, tel: +86-571-  
37 28865010, fax: +86-571-28865000, e-mail: [yanglei63@hznu.edu.cn](mailto:yanglei63@hznu.edu.cn)  
38  
39  
40  
41  
42  
43  
44  
45  
46  
47  
48  
49  
50  
51  
52  
53  
54  
55  
56  
57  
58  
59  
60

## ABSTRACT

**Objectives:** Hearing loss ( $\geq 26$  dB threshold), as a common chronic condition in humans, is increasingly gaining attention. Relevant research in China is relatively scarce, so we conduct a population-based study to investigate the prevalence of hearing loss among age groups, genders, and ears in Zhejiang province, China.

**Study design:** A Population-based cross sectional study.

**Participants:** 3754 participants aged 18-98 years and living in Zhejiang Province, China.

**Outcome measures:** Pure-tone audiometric thresholds were measured at frequencies of 0.125–8 kHz for each subject. All participants were asked to complete a structured questionnaire, in the presence of a healthcare official.

**Results.** The prevalence of speech-frequency and high-frequency hearing loss was 27.9% and 42.9%, respectively, in Zhejiang. There were significant differences in auditory thresholds at most frequencies among the age groups, genders (male versus female: 31.6% versus 24.1% at speech-frequency; 48.9% versus 36.8% at high-frequency), and ears. In addition to the common factors affecting both types of hearing loss, significant correlation was found between personal income and speech-frequency hearing loss (odds ratio [OR]=0.69, 95% confidence interval [CI]: 0.52-0.92), and between hyperlipidaemia and high-frequency hearing loss (OR=1.45, 95% CI: 1.02-2.07).

**Conclusion.** The prevalence of hearing loss was high among people living in Zhejiang, particularly males, and in the left ear. Moreover, hearing thresholds increased with age. Several lifestyle and environment factors, which can be influenced by awareness and education, were significantly associated with hearing loss.

**Key words:** hearing loss, hearing thresholds, lifestyle factors, environmental factors.

## Article Summary

### Strengths and limitations of this study.

To the best of our knowledge, this is a study conducted in Zhejiang, China, involving a large population, with data from a wide band of hearing frequencies.

The study investigated whether several lifestyle and environment factors, which can be influenced by awareness and education, were related to hearing loss, and this could provide some ideas for future intervention studies.

The specific values of medical related indicators (such as systolic blood pressure, triglyceride and fasting blood-glucose) were not analysed as these data were not collected completely, hence, medical covariates were collected only based on self-reported diagnosis (as dichotomous variable, i.e., yes or no).

## 1. Introduction

Hearing loss, the most common sensory deficit in humans<sup>1</sup>, is increasingly gaining attention; the World Health Organization estimated that the prevalence of hearing loss increased from 42 million in 1985 to 360 million in 2011.<sup>2</sup> According to a US study, more than 36 million people (16–17% adolescents) suffered from varying degrees of hearing loss.<sup>3</sup> Moreover, Twardella et al. reported that the prevalence of hearing loss among adolescents in Germany was approximately 2.4%.<sup>4</sup> Although the literature on hearing loss has gradually increased, these studies were either conducted in countries other than China, or the number of participants was small.<sup>5</sup> In addition, the hearing test did not cover a wide band of frequencies.<sup>6</sup>

As a common chronic condition in humans, hearing loss affects communication and can, therefore, affect the quality of life of the individual. Furthermore, it has substantial direct and indirect societal costs.<sup>7</sup> Moreover, in the 25-year Global Burden of Disease study, hearing loss was the second most common non-fatal disease affecting the quality of life of Chinese individuals.<sup>8</sup> However, the exact mechanisms of hearing loss remain unclear. Thus, there is an urgent need to study the prevalence of hearing loss and its related risk factors. Several studies have reported that hearing function is associated with age, sex, heredity, and environmental factors (such as noise exposure and heavy metal exposure)<sup>9, 10</sup>, but similar research in China is still relatively scarce.

Hence, in the present study, data of audiometric measurements and responses to structured questionnaires were collected to investigate the prevalence of hearing loss in adults in Zhejiang, China; while other Chinese studies were conducted elsewhere, this is the first study to be conducted in Zhejiang with a large sample size and wide band of frequencies (0.125 to 8 kHz). An epidemiological study can well describe the hearing threshold levels and hearing loss in the Chinese population, and provide some data that

1  
2  
3 can be used to develop interventions for preventing early hearing loss as well as for  
4  
5 further investigation.  
6  
7  
8  
9

## 10 **2. Methods**

### 11 *Study Areas and Participants*

12  
13  
14 A study using a multi-stage stratified cluster random sampling method was conducted  
15  
16 in the Zhejiang province from September 2016 to June 2018. Five healthcare centres  
17  
18 were selected as follows: 1 in Jiangshan, 1 in Jiaxing, and 3 in Hangzhou (Tonglu  
19  
20 county, Baiyang community, and Sijiqing community). Complete audiometric  
21  
22 examination data and questionnaire data of 3754 participants (1900 males and 1854  
23  
24 females) (18–98 years old) were analysed. The participants were divided into 3 age  
25  
26 groups: the young group (18–44 years old, mean age=34.19±6.35 [mean±standard  
27  
28 deviation]), the middle group (45–59 years old, mean age=51.82±4.34), and the old  
29  
30 group (60–98 years old, mean age=68.07±7.14).<sup>11</sup>  
31  
32  
33  
34

35  
36 The whole process of study was approved by the Ethics Committee of Hangzhou  
37  
38 Normal University. All subjects provided written informed consent and the study had  
39  
40 been performed in accordance with the ethical standards laid down in the 1964  
41  
42 Declaration of Helsinki and its later amendments and local government policies.  
43

### 44 *Patient and public involvement*

45  
46 The role of subjects (including patients) in this study was participants. All subjects did  
47  
48 not participate in the design, recruitment and other research work. After the completion  
49  
50 of the study, we had called participants to elaborate on the results of this study in detail  
51  
52 (if they indicated that they needed the results at the time of data collection).  
53  
54

### 55 *Audiometry test*

56  
57  
58 First, otoscopic examination was performed for each participant by an otolaryngologist  
59  
60

1  
2  
3 to detect any ear pathology potentially affecting hearing function. A total of 631  
4 participants (14.39% [631/4385]) who had an ear disease (such as otitis externa, otitis  
5 media, or cerumen impaction) or abnormal ear structure were excluded from the  
6 analysis. All pure-tone air conduction hearing thresholds were measured by trained  
7 researchers using audiometers (AT235; Interacoustics AS, Assens, Denmark) with  
8 standard headphones (TDH-39; Telephonic Corporation, Farmingdale, USA). Each  
9 subject was specifically instructed to press a handheld response key as soon as they  
10 heard a tone of a frequency between 0.125 and 8 kHz (0.125, 0.25, 0.5, 1, 2, 3, 4, 6, and  
11 8 kHz) over an intensity range of -10 to 110 dB in a soundproof booth with background  
12 noise of less than 20 dB(A). All facilities were calibrated before use, and similar to the  
13 study conducted by Wang et al.<sup>5</sup>, we conducted the testing by beginning at 1 kHz,  
14 continuing to higher test frequencies and then returning to 1 kHz, followed by testing  
15 lower frequencies.<sup>5</sup> We computed the pure-tone average (PTA) at speech frequencies  
16 (0.5, 1, 2, and 4 kHz; speech-PTA), and at high frequencies (3, 4, 6, and 8 kHz; high-  
17 PTA).<sup>12</sup> Hearing loss was defined as speech-PTA of  $\geq 26$  dB in the better ear,<sup>9</sup> which is  
18 consistent with the WHO definition of clinically significant hearing loss,<sup>13</sup> and this can  
19 identify patients with bilateral hearing loss and related functional impairments.<sup>14</sup>

### 20 21 22 23 24 25 26 27 28 29 30 31 32 33 34 35 36 37 38 39 40 41 42 **Covariates**

43 All participants were asked to complete a structured questionnaire, in the presence of a  
44 healthcare official, covering demographic variables, audiometric information, lifestyle  
45 and environmental factors, as well as issues related to various risk factors and diseases.  
46 Education level was categorized as elementary school or less, middle school graduation,  
47 high school graduation, and college or more. Average monthly income was classified  
48 into 3 categories (low:  $\leq 4000$  RMB; middle: 4001–6000 RMB; high:  $\geq 6001$  RMB).  
49 Based on the history of cigarette smoking status, participants were categorized as  
50  
51  
52  
53  
54  
55  
56  
57  
58  
59  
60



1  
2  
3 follows: self-reported non-smokers (smoking less than 1 cigarette a day on average for  
4 less than 1 year), former smokers (cessation of smoking since the past 6 months or  
5 more), and current smokers (smoking at least one cigarette a day for more than 1 year).  
6  
7  
8  
9  
10 Based on drinking history, participants were also categorized as follows: self-reported  
11 non-drinkers (less than once per week), former drinkers (abstinence for more than 6  
12 months), and current drinkers (alcohol consumption at least once a week for more than  
13  
14  
15  
16  
17 6 months). If a participant indicated an exposure to loud noise in the workplace at least  
18 once a week, then the participant was considered to experience occupational noise  
19 exposure. If the participant had been exposed to loud noise outside of work (e.g., loud  
20 music or power tools) at least once a week, then the participant was considered to be  
21 exposed to recreational noise. Self-reported medical information, mainly about  
22 hypertension, hyperlipidaemia, diabetes, and hypercholesterolemia, was also collected.  
23  
24  
25  
26  
27  
28  
29

### 30 ***Statistical analysis***

31  
32  
33 The study used Epidata 3.1 (The Epidata Association, Odense, Denmark) for survey  
34 data entry and check and error correction (double entry and validation). SPSS (version  
35 19.0 for Windows; SPSS, Inc., Chicago, USA) was used to conduct all statistical  
36 analyses, and the results were graphed using the SigmaPlot 12.0 software package  
37 (Systat Software International., Chicago, USA). A Kolmogorov-Smirnov normality test  
38 was performed to examine the distribution of each variable. Data were presented as  
39 proportions, mean±standard deviation (SD), or median (interquartile range), according  
40 to the original data distribution. The Student's t-test and chi square test were used to  
41 compare differences between the groups. In addition, the differences between the left  
42 and right ear were analysed using the paired t-test, and the Bonferroni correction for  
43 pairwise comparisons. Logistic regression was used to estimate the association between  
44 hearing loss (as binary variable, which could better represent the odds ratio of different  
45  
46  
47  
48  
49  
50  
51  
52  
53  
54  
55  
56  
57  
58  
59  
60

factors in the two populations) and the variables (as categorical variables), after adjustment for age and gender. All reported probability values were two-tailed, and a  $P$  value of less than 0.05 was considered statistically significant.

### 3. Results

#### *Comparison of hearing thresholds among different populations*

The PTA for all age groups at speech frequency and high frequency is shown in Figure 1 and Figure 2, respectively. There were statistically significant differences between the left and right ear (when age was over 60 years,  $P<0.05$ ) with respect to PTA, both in speech frequency (33.91dB versus 32.21dB [total participants, age was over 60 years]) and high frequency (42.32dB versus 40.18dB), and the hearing loss was more prevalent in the left ear.

There were significant differences between the male and female participants in the young, middle, and old group (especially at 3, 4, 6, and 8 kHz,  $P<0.05$ , data not shown) (Figure 3). In general, compared with men, women had better hearing (male versus female: 31.6% versus 24.1% at speech-frequency; 48.9% versus 36.8% at high-frequency [Table 1]). Meanwhile, Table 1 and Table S1 (comprising original PTA data) show that significant differences in hearing loss were found among the three selected areas. The prevalence of hearing loss in Hangzhou was the highest (33.3% for speech-frequency, and 53.9% for high-frequency hearing loss). Moreover, Figure 4 shows the PTA at the examined frequencies (0.125 to 8 kHz) among men and women in the different age groups. There were significant differences among age groups for both ears ( $P<0.05$ ) at all frequencies. PTA was the highest in the old group, and lowest in the young group.

Table 1. Hearing loss in different areas stratified by gender and age.

| Gender | Age    | Speech-frequency hearing loss $\geq 26$ dB |                    |                    |          | High-frequency hearing loss $\geq 26$ dB |                    |                    |          |
|--------|--------|--------------------------------------------|--------------------|--------------------|----------|------------------------------------------|--------------------|--------------------|----------|
|        |        | Jiangshan, %                               | Jiaying, %         | Hangzhou, %        | <i>P</i> | Jiangshan, %                             | Jiaying, %         | Hangzhou, %        | <i>P</i> |
| Male   | Young  | 5.2<br>(13/249)                            | 14.2<br>(27/190)   | 7.8<br>(18/230)    | 0.003    | 13.3<br>(33/249)                         | 18.4<br>(35/190)   | 18.7<br>(43/230)   | 0.202    |
|        | Middle | 27.0<br>(65/241)                           | 24.6<br>(44/179)   | 30.8<br>(60/195)   | 0.398    | 52.3<br>(126/241)                        | 33.5<br>(60/179)   | 67.7<br>(132/195)  | <0.001   |
|        | Old    | 65.2<br>(131/201)                          | 51.2<br>(84/164)   | 62.9<br>(158/251)  | 0.015    | 88.6<br>(178/201)                        | 61.0<br>(100/164)  | 88.4<br>(222/251)  | <0.001   |
| Female | Young  | 3.9<br>(10/256)                            | 4.8<br>(12/248)    | 5.3<br>(14/265)    | 0.751    | 7.8<br>(20/256)                          | 12.1<br>(30/248)   | 14.7<br>(39/265)   | 0.046    |
|        | Middle | 18.8<br>(38/202)                           | 21.9<br>(34/155)   | 26.8<br>(59/220)   | 0.141    | 29.2<br>(59/202)                         | 34.8<br>(54/155)   | 50.0<br>(110/220)  | <0.001   |
|        | Old    | 48.0<br>(47/98)                            | 45.4<br>(69/152)   | 63.2<br>(163/258)  | 0.001    | 71.4<br>(70/98)                          | 53.9<br>(82/152)   | 84.9<br>(219/258)  | <0.001   |
| Total  |        | 24.4<br>(304/1247)                         | 24.8<br>(270/1088) | 33.3<br>(472/1419) | <0.001   | 39.0<br>(486/1247)                       | 33.2<br>(361/1088) | 53.9<br>(765/1419) | <0.001   |

### *The correlation between hearing loss and covariates*

Of the 3754 eligible participants, a total of 1046 (27.9%) had speech-frequency hearing loss, and 1612 (42.9%) had high-frequency hearing loss. Table 2 shows the results of the comparison of the sociodemographic characteristics of the participants affected by hearing loss at speech-frequency and high-frequency. Participants with hearing loss group were on average 17 years older than those without hearing loss. Furthermore, there was a higher proportion of men in the hearing-loss group than in the normal-hearing group (speech-frequency, 57.4% versus 48.0%,  $P<0.001$ ; high-frequency, 57.6% versus 45.3%,  $P<0.001$ ). In addition, education, personal income, noise exposure (Table S2), smoking status, and drinking status were significantly associated with both types of hearing loss (all  $P<0.001$ ). As for medical covariate data, there was a significant correlation between hearing loss and presence of hypertension, hyperlipidaemia, diabetes, and hypercholesterolemia (all  $P<0.001$ , for speech-frequency and high-frequency hearing loss).

Table 2. Characteristics of study participants

|                                 | Speech-frequency hearing loss $\geq 26$ dB |                   |          | High-frequency hearing loss $\geq 26$ dB |                   |          |
|---------------------------------|--------------------------------------------|-------------------|----------|------------------------------------------|-------------------|----------|
|                                 | No                                         | Yes               | <i>P</i> | No                                       | Yes               | <i>P</i> |
| Number                          | 2708                                       | 1046              |          | 2142                                     | 1612              |          |
| Age, years                      | 45.28 $\pm$ 13.56                          | 61.97 $\pm$ 12.38 | <0.001   | 42.83 $\pm$ 12.92                        | 59.37 $\pm$ 12.68 | <0.001   |
| Gender, % (men)                 | 48.0                                       | 57.4              | <0.001   | 45.3                                     | 57.6              | <0.001   |
| Education, %                    |                                            |                   |          |                                          |                   |          |
| $\leq$ Elementary school        | 7.2                                        | 23.9              |          | 5.5                                      | 20.3              |          |
| Middle school                   | 20.6                                       | 28.9              |          | 17.5                                     | 30.1              |          |
| High school                     | 27.4                                       | 26.5              |          | 28.0                                     | 26.0              |          |
| $\geq$ College                  | 44.8                                       | 20.7              | <0.001   | 49.1                                     | 23.5              | <0.001   |
| Income: low/middle/high, %      | 37.1/44.7/18.2                             | 55.2/32.2/12.6    | <0.001   | 34.9/46.9/18.2                           | 51.7/33.7/14.6    | <0.001   |
| Smoking: non/former/current, %  | 79.0/4.6/16.4                              | 62.2/11.8/26.0    | <0.001   | 83.1/3.5/13.4                            | 62.6/10.7/26.7    | <0.001   |
| Drinking: non/former/current, % | 83.9/1.4/14.7                              | 69.1/2.6/28.3     | <0.001   | 86.5/1.4/12.1                            | 70.9/2.1/27.0     | <0.001   |
| Occupational noise exposure, %  | 36.5                                       | 46.7              | <0.001   | 35.7                                     | 44.2              | <0.001   |
| Recreational noise exposure, %  | 21.4                                       | 31.3              | <0.001   | 20.5                                     | 28.9              | <0.001   |
| Hypertension, %                 | 13.7                                       | 43.7              | <0.001   | 10.2                                     | 37.8              | <0.001   |
| Hyperlipidemia, %               | 4.9                                        | 13.6              | <0.001   | 3.3                                      | 12.7              | <0.001   |
| Diabetes, %                     | 3.2                                        | 12.4              | <0.001   | 1.8                                      | 11.0              | <0.001   |
| Hypercholesterolemia, %         | 2.0                                        | 5.2               | <0.001   | 1.7                                      | 4.4               | <0.001   |

1  
2  
3 After adjustment for age and gender, a logistic regression analysis was performed to  
4 estimate the correlation between hearing loss and independent variables (Table 3). The  
5 correlation between education and speech-frequency hearing was not significant  
6 ( $P=0.064$ ), although the risk of hearing loss decreased as the level of education  
7 increased. High personal income was found to have a significant negative correlation  
8 with hearing loss (odds ratio [OR]=0.69, 95% confidence intervals [CI]: 0.52–0.92,  
9  $P=0.025$ ). The adjusted ORs for the comparison of current smokers and non-smokers  
10 and current drinkers and non-drinkers were 1.43 (95% CI: 1.11–1.85) ( $P$  for  
11 trend=0.007) and 1.44 (95% CI: 1.15–1.82) ( $P$  for trend=0.004), respectively. The  
12 results showed that both types of noise exposures were risk factors for hearing loss. As  
13 for common chronic diseases, no significant association was found between presence  
14 of hyperlipidaemia or hypercholesterolemia and hearing loss (for hyperlipidaemia,  
15 OR=1.03, 95% CI: 0.75–1.41,  $P=0.848$ ; for hypercholesterolemia, OR=1.31, 95% CI:  
16 0.81–2.12,  $P=0.275$ ). Hearing loss was associated with diabetes with borderline  
17 significance (OR=1.39, 95% CI: 0.99–1.95,  $P=0.061$ ), and hypertension was found to  
18 be significantly associated with hearing loss (OR=2.28, 95% CI: 1.87–2.79,  $P<0.001$ ).  
19  
20  
21  
22  
23  
24  
25  
26  
27  
28  
29  
30  
31  
32  
33  
34  
35  
36  
37  
38  
39

40 Moreover, smoking, drinking, occupational noise, recreational noise, hypertension,  
41 and diabetes were risk factors for high-frequency hearing loss, whereas a high education  
42 level was a protective factor. In contrast with speech-frequency hearing loss,  
43 hyperlipidaemia was positively associated with hearing loss (OR=1.45, 95% CI: 1.02–  
44 2.07,  $P=0.039$ ), while no significant association was found between income and hearing  
45 loss. The effects of smoking and hypertension on hearing loss were the greatest (for  
46 smoking, OR=2.08, 95% CI: 1.63–2.65; for hypertension, OR=2.17, 95% CI: 1.76–  
47 2.68).  
48  
49  
50  
51  
52  
53  
54  
55  
56  
57  
58  
59  
60

Table 3. Logistic regression analysis of all the correlations of hearing loss

|                     | Speech-frequency hearing loss $\geq 26$ dB |                  |                 | High-frequency hearing loss $\geq 26$ dB |                  |                 |
|---------------------|--------------------------------------------|------------------|-----------------|------------------------------------------|------------------|-----------------|
|                     | Yes/Total                                  | ORs (95% CIs)    | <i>P</i> -trend | Yes/Total                                | OR (95% CI)      | <i>P</i> -trend |
| Education           |                                            |                  |                 |                                          |                  |                 |
| ≤ Elementary school | 250/445                                    | 1 (Reference)    |                 | 328/445                                  | 1 (Reference)    |                 |
| Middle school       | 302/860                                    | 0.75 (0.57-0.98) |                 | 486/860                                  | 0.93 (0.70-1.25) |                 |
| High school         | 277/1018                                   | 0.73 (0.55-0.97) |                 | 419/1018                                 | 0.65 (0.48-0.87) |                 |
| ≥ College           | 217/1431                                   | 0.66 (0.48-0.90) | 0.064           | 379/1431                                 | 0.60 (0.43-0.82) | <0.001          |
| Income              |                                            |                  |                 |                                          |                  |                 |
| Low                 | 577/1581                                   | 1 (Reference)    |                 | 834/1581                                 | 1 (Reference)    |                 |
| Middle              | 337/1547                                   | 0.80 (0.65-0.99) |                 | 543/1547                                 | 0.82 (0.67-0.99) |                 |
| High                | 132/626                                    | 0.69 (0.52-0.92) | 0.025           | 235/626                                  | 0.89 (0.69-1.16) | 0.129           |
| Smoking             |                                            |                  |                 |                                          |                  |                 |
| non-                | 651/2789                                   | 1 (Reference)    |                 | 1009/2789                                | 1 (Reference)    |                 |
| former-             | 123/248                                    | 1.50 (1.07-2.11) |                 | 173/248                                  | 1.85 (1.30-2.64) |                 |
| current-            | 272/717                                    | 1.43 (1.11-1.85) | 0.007           | 430/717                                  | 2.08 (1.63-2.65) | <0.001          |
| Drinking            |                                            |                  |                 |                                          |                  |                 |
| non-                | 723/2995                                   | 1 (Reference)    |                 | 1143/2995                                | 1 (Reference)    |                 |
| former-             | 27/65                                      | 1.64 (0.87-3.09) |                 | 34/65                                    | 1.13 (0.60-2.13) |                 |
| current-            | 296/694                                    | 1.44 (1.15-1.82) | 0.004           | 435/694                                  | 1.38 (1.10-1.74) | 0.022           |
| Occupational noise  |                                            |                  |                 |                                          |                  |                 |
| no                  | 557/2277                                   | 1 (Reference)    |                 | 899/2277                                 | 1 (Reference)    |                 |
| yes                 | 489/1477                                   | 1.35 (1.12-1.62) | 0.001           | 713/1477                                 | 1.29 (1.08-1.54) | 0.004           |
| Recreational noise  |                                            |                  |                 |                                          |                  |                 |
| no                  | 719/2848                                   | 1 (Reference)    |                 | 1134/2825                                | 1 (Reference)    |                 |
| yes                 | 327/906                                    | 1.39 (1.13-1.70) | 0.002           | 461/896                                  | 1.39 (1.14-1.70) | 0.001           |
| Hypertension        |                                            |                  |                 |                                          |                  |                 |
| no                  | 589/2926                                   | 1 (Reference)    |                 | 1003/2926                                | 1 (Reference)    |                 |
| yes                 | 457/828                                    | 2.28 (1.87-2.79) | <0.001          | 609/828                                  | 2.17 (1.76-2.68) | <0.001          |

|    |                      |          |                  |       |           |                  |       |
|----|----------------------|----------|------------------|-------|-----------|------------------|-------|
| 1  |                      |          |                  |       |           |                  |       |
| 2  |                      |          |                  |       |           |                  |       |
| 3  |                      |          |                  |       |           |                  |       |
| 4  |                      |          |                  |       |           |                  |       |
| 5  | Hyperlipidemia       |          |                  |       |           |                  |       |
| 6  | no                   | 904/3479 | 1 (Reference)    |       | 1407/3479 | 1 (Reference)    |       |
| 7  | yes                  | 142/275  | 1.03 (0.75-1.41) | 0.848 | 205/275   | 1.45 (1.02-2.07) | 0.039 |
| 8  | Diabetes             |          |                  |       |           |                  |       |
| 9  | no                   | 916/3538 | 1 (Reference)    |       | 1435/3538 | 1 (Reference)    |       |
| 10 | yes                  | 130/216  | 1.39 (0.99-1.95) | 0.061 | 177/216   | 1.82 (1.21-2.75) | 0.004 |
| 11 | Hypercholesterolemia |          |                  |       |           |                  |       |
| 12 | no                   | 992/3647 | 1 (Reference)    |       | 1541/3647 | 1 (Reference)    |       |
| 13 | yes                  | 54/107   | 1.31 (0.81-2.12) | 0.275 | 71/107    | 1.01 (0.60-1.69) | 0.983 |

Note: analysis were adjusted for gender and age. Age was represented by categorical variables.



#### 4. Discussion

This cross-sectional study, conducted in a large population and based on a cohort of local individuals in the Zhejiang province, provides information about the hearing threshold levels and prevalence of hearing loss among the people in Zhejiang, China. Based on the standard definition (speech-PTA [i.e., the average of 0.5, 1, 2, and 4 kHz hearing threshold] of  $\geq 26$  dB in the better ear), we estimated that 27.9% of the participants had speech-frequency hearing loss, which is different from the prevalence reported in other Chinese studies i.e., those conducted by Bu<sup>15</sup> and Gong<sup>6</sup> (11.7% and 58.85%). Differences in education, economics, and industrialization level due to geographical distribution of the population surveyed may be one of the reasons. On the other hand, the study by Gong et al was conducted among older adults ( $\geq 60$  years), surprisingly, the prevalence of hearing loss in the elderly in our study was calculated as 58.23%, which was very close to that of Gong. Consistent with other studies<sup>5, 16, 17</sup>, women often had a lower PTA than men, at most frequencies (from 1 to 8 kHz), in both the left and right ear. Among these examined frequencies, significant differences were found between the young, middle and old groups for PTA ( $P < 0.001$ ), confirming that the hearing threshold increases with age, both in males and females.<sup>18</sup> Furthermore, Sommer reported that a 1-year increase in age would raise the risk of hearing loss by 15%.<sup>14</sup>

Right ear dominance for PTA was identified in this study. Especially in participants older than 60 years, the right ear had better hearing ability than the left, which can be explained from the perspective of neurology. The ascending auditory projections pass through the brainstem and end in the cerebral cortex of the ipsi- and contra-lateral hemispheres, with a predominant representation on the side opposite to the ear.<sup>19</sup> In brief, the sound collected through the right ear is formed in the left hemisphere, and

1  
2  
3 vice versa. Therefore, based on the anatomical characteristics of the human brain, right  
4 ear input is directly transferred to the speech perception areas in the left hemisphere,  
5  
6 whereas stimuli to the left ear have to be transferred initially to the right hemisphere,  
7  
8 from which it is transferred to the left hemisphere through the corpus callosum.<sup>19</sup> Some  
9  
10 studies have also identified the right ear dominance in certain populations,<sup>20-22</sup> which  
11  
12 in turn, supports the above theoretical basis. In contrast, another study in Switzerland  
13  
14 suggested that PTA has no significant differences between both ears.<sup>23</sup>  
15  
16  
17  
18

19 Hangzhou had the highest prevalence of hearing loss among the three selected areas.  
20  
21 As a modern city with a highly developed economy, Hangzhou is filled with industrial  
22  
23 noise, whereas the other two regions have a slightly less-developed economy, with less  
24  
25 industrial noise. This is similar to inferences made by Wang et al.<sup>5</sup> Meanwhile,  
26  
27 consistent with previous studies, noise exposures (including occupational noise and  
28  
29 recreational noise) were found to be risk factors for hearing loss,<sup>6, 24, 25</sup> while education  
30  
31 (for high-frequency hearing loss) and personal income (for speech-frequency hearing  
32  
33 loss) were protective factors. Highly educated people have a better knowledge of health,  
34  
35 and people with high personal income can prevent hearing loss by using low-noise  
36  
37 devices or by avoiding high-noise workplaces.  
38  
39  
40  
41

42 Our results support the evidence that smoking and drinking have associations with  
43  
44 the risk of hearing loss.<sup>26, 27</sup> Cruickshanks et al.<sup>28</sup> estimated that current smokers were  
45  
46 1.69 times more likely to have hearing loss than non-smokers (95% CI: 1.31–2.17),  
47  
48 which is similar to the results obtained in our study (1.66-fold, 95% CI: 1.24–2.22).  
49  
50 Similarly, a multi-centre study conducted by Fransen et al.<sup>29</sup> reported that smoking  
51  
52 significantly increased high-frequency hearing loss in a dose-dependent fashion.  
53  
54

55 Among the factors evaluated in the present study, hypertension had the strongest  
56  
57 effect. The risk of hearing loss was 2 times higher in people with hypertension than in  
58  
59  
60

1  
2  
3 those without hypertension. Similar results were also found in other studies.<sup>30, 31</sup> Our  
4 study only found borderline association between diabetes and hearing loss, similar to  
5 the equivocal results from other studies.<sup>32, 33</sup> A likely explanation for these inconsistent  
6 results is that hearing loss is only weakly associated with diabetes, whose effects may  
7 be masked by other strong factors (e.g. age<sup>6</sup>). Another explanation is that the number  
8 of participants with diabetes is small in this study.

9  
10  
11  
12  
13  
14  
15  
16  
17 The limitations of this study should be considered. First, owing to the cross-sectional  
18 study nature, a causal relationship could not be established. Second, medical covariates  
19 were collected based on self-reported diagnosis, and specific values were not analysed  
20 as these data were not collected completely. Third, similar to the study conducted by  
21 Choi<sup>34</sup>, we cannot rule out potential residual confounding by the presence of a noisy  
22 environment that were not captured by the binary variables of occupational and  
23 recreational noise (refer to exposure at the time of data collection). Fourth, the burden  
24 of hearing loss may be underestimated due to the exclusion of patients with ear diseases.

25  
26  
27  
28  
29  
30  
31  
32  
33  
34  
35 In conclusion, the differences based on age and gender in hearing threshold levels  
36 and hearing loss were identified. Older men living in modern cities filled with industrial  
37 noise should pay more attention to their hearing status. We found a right ear dominance  
38 throughout all audiometric parameters. Harmful habits, like smoking and drinking, and  
39 ambient noise (including occupational and recreational noise) are associated with  
40 hearing loss. Educating and advising individuals to maintain good general health and  
41 fitness would have benefits for hearing preservation.<sup>26</sup> Furthermore, we found evidence  
42 that among several common chronic diseases, hypertension is the most closely related  
43 to hearing loss, which requires special attention to the hearing of patients with  
44 hypertension. Hearing loss is a multifactorial condition that is a result of multiple  
45 intrinsic and extrinsic factors acting on the ears, and further prospective studies, with a  
46  
47  
48  
49  
50  
51  
52  
53  
54  
55  
56  
57  
58  
59  
60

1  
2  
3 multi-centre approach and wider ranges of exposure, are required to confirm the related  
4  
5 risk factors.  
6  
7

8 We hope that our data can provide information on hearing loss for the development  
9  
10 of national public health policies, and can help identify some related factors for early  
11  
12 intervention. As a developing country, society is more concerned about various fatal  
13  
14 diseases, economy and ecology, so that our country attaches lesser importance to  
15  
16 hearing loss than other developed countries, and we simultaneously hope to arouse the  
17  
18 government's attention to this condition.  
19  
20  
21  
22  
23  
24  
25  
26  
27  
28  
29  
30  
31  
32  
33  
34  
35  
36  
37  
38  
39  
40  
41  
42  
43  
44  
45  
46  
47  
48  
49  
50  
51  
52  
53  
54  
55  
56  
57  
58  
59  
60

1  
2  
3 **Author Contributors** DW and HZ are joint first authors. DW edited the article,  
4  
5  
6  
7  
8  
9  
10  
11  
12  
13  
14  
15  
16  
17  
18  
19  
20  
21  
22  
23  
24  
25  
26  
27  
28  
29  
30  
31  
32  
33  
34  
35  
36  
37  
38  
39  
40  
41  
42  
43  
44  
45  
46  
47  
48  
49  
50  
51  
52  
53  
54  
55  
56  
57  
58  
59  
60  
oversaw data analysis and preparation of supplementary files. HZ conducted the statistical analysis, interpretation and drafted the article. HM and LZ contributed to collecting prevalence estimates and preparation of supplementary files. LY and LX originated the study and designed the analysis, and both of them are coinvestigators and approved the final version of the article.

**Funding** This work was supported by the Zhejiang Key Research and Development Program (grant number 2015C03050), and the Major Science and Technology Innovation Project of Hangzhou (grant number 20152013A01).

**Competing interests** All authors have completed the ICMJE uniform disclosure form at [http://www.icmje.org/coi\\_disclosure.pdf](http://www.icmje.org/coi_disclosure.pdf) and declare: Lei Yang and Liang-Wen Xu had financial support from the Zhejiang Key Research and Development Program and the Major Science and Technology Innovation Project of Hangzhou for the submitted work; no financial relationships with any organisations that might have an interest in the submitted work in the previous 3 years; no other relationships or activities that could appear to have influenced the submitted work.

**Ethics approval** The study was approved by the Hangzhou Normal University ethics committee.

**Data sharing statement** No additional data are available.

## References

1. Bowl MR, MM Simon, NJ Ingham, *et al.* A large scale hearing loss screen reveals an extensive unexplored genetic landscape for auditory dysfunction. *Nat Commun.* 2017; **8**(1):886.
2. Olusanya BO, KJ Neumann, JE Saunders. The global burden of disabling hearing impairment: a call to action. *Bull World Health Organ.* 2014; **92**(5):367-373.
3. Schiller JS, JW Lucas, BW Ward, *et al.* Summary health statistics for U.S. adults: National Health Interview Survey, 2010. *Vital Health Stat 10.* 2012(252):1-207.
4. Twardella D, C Perez-Alvarez, T Steffens, *et al.* The prevalence of audiometric notches in adolescents in Germany: The Ohrkan-study. *Noise Health.* 2013; **15**(67):412-419.
5. Wang JG, XY Qian, J Chen, *et al.* A Cross-Sectional Study on the Hearing Threshold Levels Among People in Qinling, Qinghai, and Nanjing, China. *American Journal of Audiology.* 2018; **27**(1):147-155.
6. Gong R, XY Hu, C Gong, *et al.* Hearing loss prevalence and risk factors among older adults in China. *International Journal Of Audiology.* 2018; **57**(5):354-359.
7. Dalton DS, KJ Cruickshanks, BE Klein, *et al.* The impact of hearing loss on quality of life in older adults. *Gerontologist.* 2003; **43**(5):661-668.
8. GBD GDaIIaPC. Global, regional, and national incidence, prevalence, and years lived with disability for 328 diseases and injuries for 195 countries, 1990-2016: a systematic analysis for the Global Burden of Disease Study 2016. *Lancet.* 2017; **390**(10100):1211-1259.
9. Agrawal Y, EA Platz, JK Niparko. Prevalence of hearing loss and differences by demographic characteristics among US adults: data from the National Health and

- 1  
2  
3 Nutrition Examination Survey, 1999-2004. *Arch Intern Med.* 2008; **168**(14):1522-  
4  
5 1530.  
6  
7  
8 10. Helzner EP, JA Cauley, SR Pratt, *et al.* Race and sex differences in age-related  
9  
10 hearing loss: the Health, Aging and Body Composition Study. *J Am Geriatr Soc.*  
11  
12 2005; **53**(12):2119-2127.  
13  
14  
15 11. Truelsen T, S Begg, C Mathers. The global burden of cerebrovascular. *WHO Int.*  
16  
17 2006.  
18  
19 12. Choi YH, H Hu, S Tak, *et al.* Occupational noise exposure assessment using  
20  
21 O\*NET and its application to a study of hearing loss in the US general population.  
22  
23 *Occup Environ Med.* 2012; **69**(3):176-183.  
24  
25  
26 13. Vaughan G. *Deafness and hearing loss.* 2018; Available from:  
27  
28 <http://www.who.int/news-room/fact-sheets/detail/deafness-and-hearing-loss>.  
29  
30  
31 14. Sommer J, CG Brenann-Jones, RH Eikelboom, *et al.* A population-based study of  
32  
33 the association between dysglycaemia and hearing loss in middle age. *Diabetic*  
34  
35 *Medicine.* 2017; **34**(5):683-690.  
36  
37  
38 15. Bu X, C Liu, G Xing, *et al.* WHO Ear and Hearing Disorders Survey in four  
39  
40 provinces in China. *Audiological Medicine.* 2011; **9**(4):141-146.  
41  
42  
43 16. Brant LJ, S Gordon-Salant, JD Pearson, *et al.* Risk factors related to age-associated  
44  
45 hearing loss in the speech frequencies. *J Am Acad Audiol.* 1996; **7**(3):152-160.  
46  
47  
48 17. Kim JS. Prevalence and Factors Associated With Hearing Loss and Hearing Aid  
49  
50 Use in Korean Elders. *Iranian Journal Of Public Health.* 2015; **44**(3):308-317.  
51  
52  
53 18. Liu H, H Luo, T Yang, *et al.* Association of leukocyte telomere length and the risk  
54  
55 of age-related hearing impairment in Chinese Hans. *Sci Rep.* 2017; **7**(1):10106.  
56  
57  
58 19. Westerhausen R,K Hugdahl. The corpus callosum in dichotic listening studies of  
59  
60 hemispheric asymmetry: a review of clinical and experimental evidence. *Neurosci*

- 1  
2  
3 *Biobehav Rev.* 2008; **32**(5):1044-1054.  
4  
5  
6 20. Budenz CL, MK Cosetti, DH Coelho, *et al.* The effects of cochlear implantation  
7 on speech perception in older adults. *J Am Geriatr Soc.* 2011; **59**(3):446-453.  
8  
9  
10 21. Keefe DH, MP Gorga, W Jesteadt, *et al.* Ear asymmetries in middle-ear, cochlear,  
11 and brainstem responses in human infants. *J Acoust Soc Am.* 2008; **123**(3):1504-  
12 1512.  
13  
14  
15 22. Sharpe RA, EL Camposeo, WK Muzaffar, *et al.* Effects of Age and Implanted Ear  
16 on Speech Recognition in Adults with Unilateral Cochlear Implants. *Audiol*  
17 *Neurootol.* 2016; **21**(4):223-230.  
18  
19  
20 23. Wettstein VG,R Probst. Right Ear Advantage of Speech Audiometry in Single-  
21 sided Deafness. *Otol Neurotol.* 2018; **39**(4):417-421.  
22  
23  
24 24. Degeest S, E Clays, P Corthals, *et al.* Epidemiology and Risk Factors for Leisure  
25 Noise-Induced Hearing Damage in Flemish Young Adults. *Noise Health.* 2017;  
26 **19**(86):10-19.  
27  
28  
29 25. Smalt CJ, J Lacirignola, SK Davis, *et al.* Noise dosimetry for tactical environments.  
30 *Hear Res.* 2017; **349**:42-54.  
31  
32  
33 26. Lin YY, LW Wu, TW Kao, *et al.* Secondhand Smoke is Associated with Hearing  
34 Threshold Shifts in Obese Adults. *Scientific Reports.* 2016; **6**.  
35  
36  
37 27. Shimokata H. Why are individual differences in the hearing ability so great in the  
38 elderly? Relationship of hearing with systemic aging.:Relationship of hearing with  
39 systemic aging. *Audiology.* 2010; **51**(3):177-184.  
40  
41  
42 28. Cruickshanks KJ, R Klein, BE Klein, *et al.* Cigarette smoking and hearing loss: the  
43 epidemiology of hearing loss study. *JAMA.* 1998; **279**(21):1715-1719.  
44  
45  
46 29. Fransen E, V Topsakal, JJ Hendrickx, *et al.* Occupational noise, smoking, and a  
47 high body mass index are risk factors for age-related hearing impairment and  
48  
49  
50  
51  
52  
53  
54  
55  
56  
57  
58  
59  
60



- 1  
2  
3 moderate alcohol consumption is protective: A European population-based  
4 multicenter study. *Jaro-Journal Of the Association for Research In*  
5  
6 *Otolaryngology*. 2008; **9**(3):264-276.  
7  
8  
9
- 10 30. Fang Q, ZC Wang, Y Zhan, *et al*. Hearing loss is associated with increased CHD  
11 risk and unfavorable CHD-related biomarkers in the Dongfeng-Tongji cohort.  
12  
13 *Atherosclerosis*. 2018; **271**:70-76.  
14  
15
- 16 31. Ucler R, M Turan, F Garca, *et al*. The association of obesity with hearing  
17 thresholds in women aged 18-40 years. *Endocrine*. 2016; **52**(1):46-53.  
18  
19
- 20 32. Jung DJ, JH Lee, T Kim, *et al*. Association Between Hearing Impairment and  
21 Albuminuria With or Without Diabetes Mellitus. *Clinical And Experimental*  
22 *Otorhinolaryngology*. 2017; **10**(3):221-227.  
23  
24  
25  
26  
27
- 28 33. Passamonti SM, F Di Berardino, P Bucciarelli, *et al*. Risk factors for idiopathic  
29 sudden sensorineural hearing loss and their association with clinical outcome.  
30  
31 *Thrombosis Research*. 2015; **135**(3):508-512.  
32  
33  
34
- 35 34. Choi YH,SK Park. Environmental Exposures to Lead, Mercury, and Cadmium and  
36 Hearing Loss in Adults and Adolescents: KNHANES 2010-2012. *Environ Health*  
37 *Perspect*. 2017; **125**(6):067003.  
38  
39  
40  
41  
42  
43  
44  
45  
46  
47  
48  
49  
50  
51  
52  
53  
54  
55  
56  
57  
58  
59  
60

## Figure legends

### **Figure 1. Pure-tone average for all ages at speech frequencies (0.5, 1, 2 and 4kHz)**

(A: total participants; B: males participants; C: female participants). The full lines indicate the hearing thresholds of left ears, and the dotted lines indicate the hearing thresholds of right ears. Bars indicate  $\pm 1$  SD. '20y' old represents people aged 18-25y old, '30y' old represent people aged 26-35y old, '40y' old range is 36-45y old, '50y' old range is 46-55y old, '60y' old range is 56-65y old, '70y' old range is 66-75y old, '80y' old range is 76-85y old, and '90y' old range is 86-98y old.

### **Figure 2. Pure-tone average for all ages at high frequencies (3, 4, 6 and 8kHz)**

(A: total participants; B: males participants; C: female participants). The full lines indicate the hearing thresholds of left ears, and the dotted lines indicate the hearing thresholds of right ears. Bars indicate  $\pm 1$  SD. '20y' old represents people aged 18-25y old, '30y' old represent people aged 26-35y old, '40y' old range is 36-45y old, '50y' old range is 46-55y old, '60y' old range is 56-65y old, '70y' old range is 66-75y old, '80y' old range is 76-85y old, and '90y' old range is 86-98y old.

### **Figure 3. Pure-tone average of different age groups**

(A: total participants; B: male participants; C: female participants). The left parts of the figures indicate the PTA of the left ears, and the right parts indicate the PTA of the right ears.

### **Figure 4. Pure-tone average of different genders**

(A: young group; B: middle group; C: old group). The left parts of the figures indicate the PTA of the left ears, and the right parts indicate the PTA of the right ears.

1  
2  
3  
4  
5  
6  
7  
8  
9  
10  
11  
12  
13  
14  
15  
16  
17  
18  
19  
20  
21  
22  
23  
24  
25  
26  
27  
28  
29  
30  
31  
32  
33  
34  
35  
36  
37  
38  
39  
40  
41  
42  
43  
44  
45  
46  
47  
48  
49  
50  
51  
52  
53  
54  
55  
56  
57  
58  
59  
60

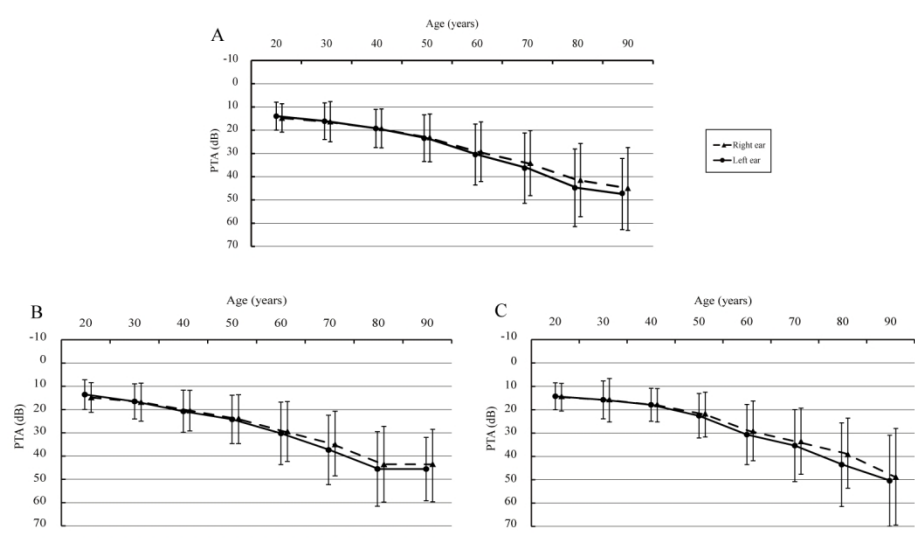

1

146x85mm (300 x 300 DPI)

1  
2  
3  
4  
5  
6  
7  
8  
9  
10  
11  
12  
13  
14  
15  
16  
17  
18  
19  
20  
21  
22  
23  
24  
25  
26  
27  
28  
29  
30  
31  
32  
33  
34  
35  
36  
37  
38  
39  
40  
41  
42  
43  
44  
45  
46  
47  
48  
49  
50  
51  
52  
53  
54  
55  
56  
57  
58  
59  
60

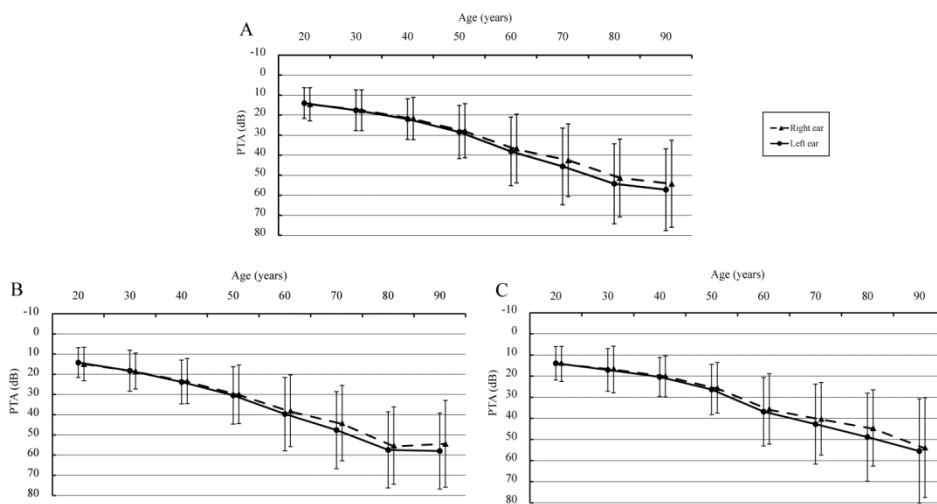

2

141x80mm (300 x 300 DPI)

1  
2  
3  
4  
5  
6  
7  
8  
9  
10  
11  
12  
13  
14  
15  
16  
17  
18  
19  
20  
21  
22  
23  
24  
25  
26  
27  
28  
29  
30  
31  
32  
33  
34  
35  
36  
37  
38  
39  
40  
41  
42  
43  
44  
45  
46  
47  
48  
49  
50  
51  
52  
53  
54  
55  
56  
57  
58  
59  
60

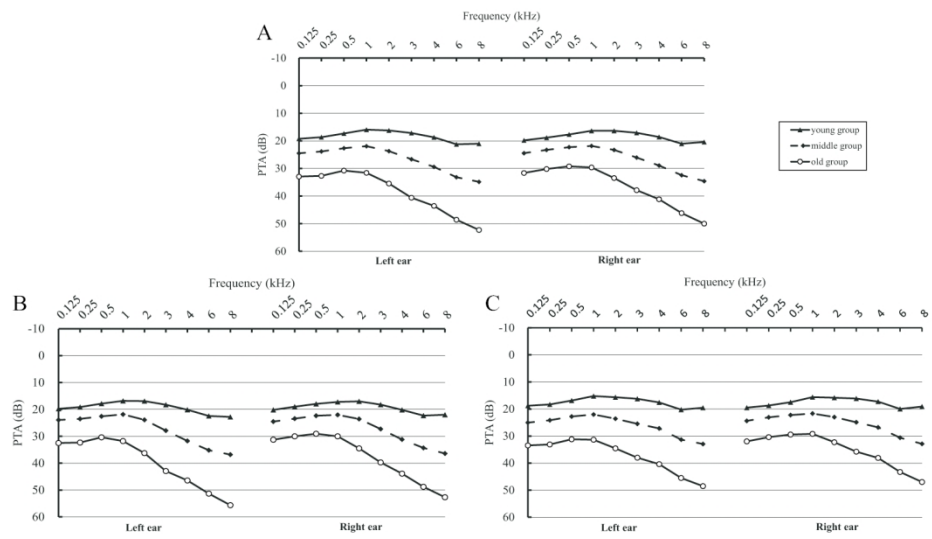

Caption: 3

1  
2  
3  
4  
5  
6  
7  
8  
9  
10  
11  
12  
13  
14  
15  
16  
17  
18  
19  
20  
21  
22  
23  
24  
25  
26  
27  
28  
29  
30  
31  
32  
33  
34  
35  
36  
37  
38  
39  
40  
41  
42  
43  
44  
45  
46  
47  
48  
49  
50  
51  
52  
53  
54  
55  
56  
57  
58  
59  
60

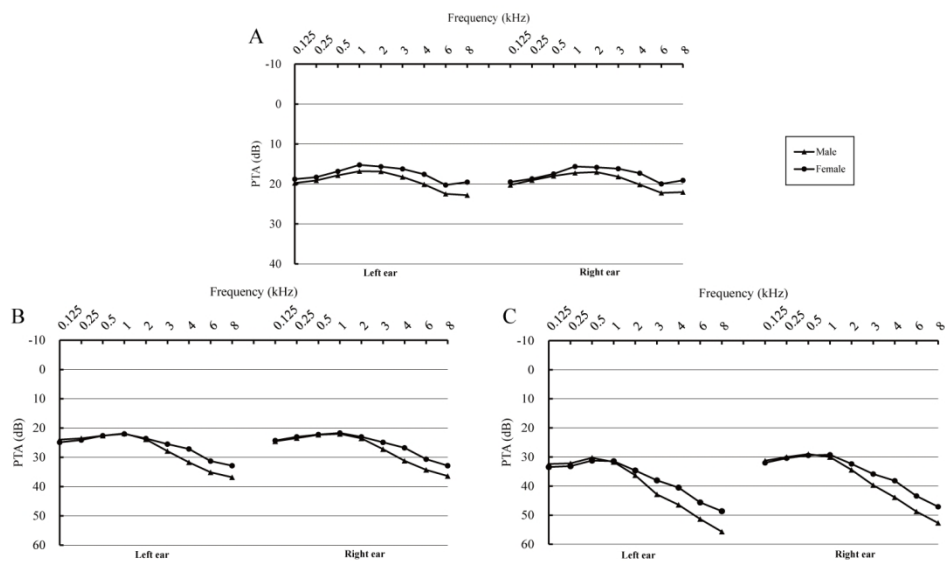

4

137x82mm (300 x 300 DPI)

Supplement Table 1. Differences in PTA (dB) in the better ear among areas.

|           | Speech-frequency hearing loss $\geq 26$ dB |             |             | High-frequency hearing loss $\geq 26$ dB |             |             |
|-----------|--------------------------------------------|-------------|-------------|------------------------------------------|-------------|-------------|
|           | Total                                      | Male        | Female      | Total                                    | Male        | Female      |
| Jiangshan | 22.25±11.56                                | 23.61±12.23 | 20.10±10.34 | 27.23±16.86                              | 30.79±18.10 | 22.82±13.98 |
| Jiaxing   | 21.23±9.91                                 | 22.39±10.02 | 20.11±9.68  | 23.09±12.09                              | 24.33±12.10 | 21.90±11.98 |
| Hangzhou  | 22.57±12.18                                | 23.41±12.45 | 21.81±11.89 | 30.25±17.45                              | 32.40±18.38 | 28.29±16.32 |
| <i>P</i>  | 0.013                                      | 0.163       | 0.004       | <0.001                                   | <0.001      | <0.001      |

For peer review only

Supplement Table 2. Characteristics information of noise exposure.

|                     | Exposure to occupational noise |      |          | Exposure to recreational noise |      |          |
|---------------------|--------------------------------|------|----------|--------------------------------|------|----------|
|                     | No                             | Yes  | <i>P</i> | No                             | Yes  | <i>P</i> |
| Number              | 2277                           | 1477 |          | 2848                           | 906  |          |
| Age group, %        |                                |      |          |                                |      |          |
| Young               | 38.7                           | 37.7 |          | 39.9                           | 33.4 |          |
| Middle              | 32.1                           | 31.2 |          | 31.4                           | 32.8 |          |
| Old                 | 29.2                           | 31.1 | 0.431    | 28.7                           | 33.8 | 0.001    |
| Gender, % (men)     | 47.9                           | 54.8 | <0.001   | 49.0                           | 55.7 | <0.001   |
| Education, %        |                                |      |          |                                |      |          |
| ≤ Elementary school | 10.7                           | 13.6 |          | 11.7                           | 12.3 |          |
| Middle school       | 21.1                           | 25.7 |          | 23.8                           | 20.2 |          |
| High school         | 26.9                           | 27.5 |          | 26.1                           | 30.2 |          |
| ≥ College           | 41.3                           | 33.2 | <0.001   | 38.4                           | 37.3 | 0.037    |
| Income, %           |                                |      |          |                                |      |          |
| Low                 | 41.0                           | 43.9 |          | 42.8                           | 40.0 |          |
| Middle              | 39.3                           | 44.1 |          | 40.4                           | 43.6 |          |
| High                | 19.7                           | 12.0 | <0.001   | 16.8                           | 16.4 | 0.222    |



# Reporting checklist for cross sectional study.

Based on the STROBE cross sectional guidelines.

## Instructions to authors

Complete this checklist by entering the page numbers from your manuscript where readers will find each of the items listed below.

Your article may not currently address all the items on the checklist. Please modify your text to include the missing information. If you are certain that an item does not apply, please write "n/a" and provide a short explanation.

Upload your completed checklist as an extra file when you submit to a journal.

In your methods section, say that you used the STROBE cross sectional reporting guidelines, and cite them as:

von Elm E, Altman DG, Egger M, Pocock SJ, Gotsche PC, Vandenbroucke JP. The Strengthening the Reporting of Observational Studies in Epidemiology (STROBE) Statement: guidelines for reporting observational studies.

|                        |     | Reporting Item                                                                                                                  | Page Number |
|------------------------|-----|---------------------------------------------------------------------------------------------------------------------------------|-------------|
| Title                  | #1a | Indicate the study's design with a commonly used term in the title or the abstract                                              | 1           |
| Abstract               | #1b | Provide in the abstract an informative and balanced summary of what was done and what was found                                 | 2           |
| Background / rationale | #2  | Explain the scientific background and rationale for the investigation being reported                                            | 2           |
| Objectives             | #3  | State specific objectives, including any prespecified hypotheses                                                                | 2           |
| Study design           | #4  | Present key elements of study design early in the paper                                                                         | 2           |
| Setting                | #5  | Describe the setting, locations, and relevant dates, including periods of recruitment, exposure, follow-up, and data collection | 5           |
| Eligibility criteria   | #6a | Give the eligibility criteria, and the sources and methods of selection of participants.                                        | 5           |

|    |                  |      |                                                                   |     |
|----|------------------|------|-------------------------------------------------------------------|-----|
| 1  |                  | #7   | Clearly define all outcomes, exposures, predictors, potential     | 6   |
| 2  |                  |      | confounders, and effect modifiers. Give diagnostic criteria, if   |     |
| 3  |                  |      | applicable                                                        |     |
| 4  |                  |      |                                                                   |     |
| 5  |                  |      |                                                                   |     |
| 6  | Data sources /   | #8   | For each variable of interest give sources of data and details of | 6   |
| 7  | measurement      |      | methods of assessment (measurement). Describe                     |     |
| 8  |                  |      | comparability of assessment methods if there is more than one     |     |
| 9  |                  |      | group. Give information separately for for exposed and            |     |
| 10 |                  |      | unexposed groups if applicable.                                   |     |
| 11 |                  |      |                                                                   |     |
| 12 |                  |      |                                                                   |     |
| 13 |                  |      |                                                                   |     |
| 14 | Bias             | #9   | Describe any efforts to address potential sources of bias         | 6   |
| 15 |                  |      |                                                                   |     |
| 16 |                  |      |                                                                   |     |
| 17 | Study size       | #10  | Explain how the study size was arrived at                         | 6   |
| 18 |                  |      |                                                                   |     |
| 19 | Quantitative     | #11  | Explain how quantitative variables were handled in the            | 6   |
| 20 | variables        |      | analyses. If applicable, describe which groupings were chosen,    |     |
| 21 |                  |      | and why                                                           |     |
| 22 |                  |      |                                                                   |     |
| 23 |                  |      |                                                                   |     |
| 24 | Statistical      | #12a | Describe all statistical methods, including those used to control | 7   |
| 25 | methods          |      | for confounding                                                   |     |
| 26 |                  |      |                                                                   |     |
| 27 |                  |      |                                                                   |     |
| 28 |                  | #12b | Describe any methods used to examine subgroups and                | 7   |
| 29 |                  |      | interactions                                                      |     |
| 30 |                  |      |                                                                   |     |
| 31 |                  |      |                                                                   |     |
| 32 |                  | #12c | Explain how missing data were addressed                           | 7   |
| 33 |                  |      |                                                                   |     |
| 34 |                  |      |                                                                   |     |
| 35 |                  | #12d | If applicable, describe analytical methods taking account of      | n/a |
| 36 |                  |      | sampling strategy                                                 |     |
| 37 |                  |      |                                                                   |     |
| 38 |                  |      |                                                                   |     |
| 39 |                  | #12e | Describe any sensitivity analyses                                 | n/a |
| 40 |                  |      |                                                                   |     |
| 41 | Participants     | #13a | Report numbers of individuals at each stage of study—eg           | 8   |
| 42 |                  |      | numbers potentially eligible, examined for eligibility, confirmed |     |
| 43 |                  |      | eligible, included in the study, completing follow-up, and        |     |
| 44 |                  |      | analysed. Give information separately for for exposed and         |     |
| 45 |                  |      | unexposed groups if applicable.                                   |     |
| 46 |                  |      |                                                                   |     |
| 47 |                  |      |                                                                   |     |
| 48 |                  |      |                                                                   |     |
| 49 |                  | #13b | Give reasons for non-participation at each stage                  | n/a |
| 50 |                  |      |                                                                   |     |
| 51 |                  |      |                                                                   |     |
| 52 |                  | #13c | Consider use of a flow diagram                                    | n/a |
| 53 |                  |      |                                                                   |     |
| 54 | Descriptive data | #14a | Give characteristics of study participants (eg demographic,       | 8   |
| 55 |                  |      | clinical, social) and information on exposures and potential      |     |
| 56 |                  |      | confounders. Give information separately for exposed and          |     |
| 57 |                  |      | unexposed groups if applicable.                                   |     |
| 58 |                  |      |                                                                   |     |
| 59 |                  |      |                                                                   |     |
| 60 |                  |      |                                                                   |     |

|    |                  |      |                                                                      |      |
|----|------------------|------|----------------------------------------------------------------------|------|
| 1  |                  | #14b | Indicate number of participants with missing data for each           | n/a  |
| 2  |                  |      | variable of interest                                                 |      |
| 3  |                  |      |                                                                      |      |
| 4  |                  |      |                                                                      |      |
| 5  | Outcome data     | #15  | Report numbers of outcome events or summary measures.                | 8    |
| 6  |                  |      | Give information separately for exposed and unexposed                |      |
| 7  |                  |      | groups if applicable.                                                |      |
| 8  |                  |      |                                                                      |      |
| 9  |                  |      |                                                                      |      |
| 10 | Main results     | #16a | Give unadjusted estimates and, if applicable, confounder-            | 8    |
| 11 |                  |      | adjusted estimates and their precision (eg, 95% confidence           |      |
| 12 |                  |      | interval). Make clear which confounders were adjusted for and        |      |
| 13 |                  |      | why they were included                                               |      |
| 14 |                  |      |                                                                      |      |
| 15 |                  |      |                                                                      |      |
| 16 |                  |      |                                                                      |      |
| 17 |                  | #16b | Report category boundaries when continuous variables were            | 8    |
| 18 |                  |      | categorized                                                          |      |
| 19 |                  |      |                                                                      |      |
| 20 |                  |      |                                                                      |      |
| 21 |                  | #16c | If relevant, consider translating estimates of relative risk into    | n/a  |
| 22 |                  |      | absolute risk for a meaningful time period                           |      |
| 23 |                  |      |                                                                      |      |
| 24 | Other analyses   | #17  | Report other analyses done—e.g., analyses of subgroups and           | n/a  |
| 25 |                  |      | interactions, and sensitivity analyses                               |      |
| 26 |                  |      |                                                                      |      |
| 27 |                  |      |                                                                      |      |
| 28 | Key results      | #18  | Summarise key results with reference to study objectives             | 9    |
| 29 |                  |      |                                                                      |      |
| 30 |                  |      |                                                                      |      |
| 31 | Limitations      | #19  | Discuss limitations of the study, taking into account sources of     | 12   |
| 32 |                  |      | potential bias or imprecision. Discuss both direction and            |      |
| 33 |                  |      | magnitude of any potential bias.                                     |      |
| 34 |                  |      |                                                                      |      |
| 35 |                  |      |                                                                      |      |
| 36 | Interpretation   | #20  | Give a cautious overall interpretation considering objectives,       | 9-12 |
| 37 |                  |      | limitations, multiplicity of analyses, results from similar studies, |      |
| 38 |                  |      | and other relevant evidence.                                         |      |
| 39 |                  |      |                                                                      |      |
| 40 |                  |      |                                                                      |      |
| 41 | Generalisability | #21  | Discuss the generalisability (external validity) of the study        | 9-12 |
| 42 |                  |      | results                                                              |      |
| 43 |                  |      |                                                                      |      |
| 44 |                  |      |                                                                      |      |
| 45 | Funding          | #22  | Give the source of funding and the role of the funders for the       | 13   |
| 46 |                  |      | present study and, if applicable, for the original study on which    |      |
| 47 |                  |      | the present article is based                                         |      |
| 48 |                  |      |                                                                      |      |
| 49 |                  |      |                                                                      |      |

The STROBE checklist is distributed under the terms of the Creative Commons Attribution License CC-BY. This checklist was completed on 08. October 2018 using <http://www.goodreports.org/>, a tool made by the [EQUATOR Network](#) in collaboration with [Penelope.ai](#)

# BMJ Open

## Population-based cross-sectional study on the hearing threshold levels and hearing loss among people in Zhejiang, China

|                                 |                                                                                                                                                                                                                                                               |
|---------------------------------|---------------------------------------------------------------------------------------------------------------------------------------------------------------------------------------------------------------------------------------------------------------|
| Journal:                        | <i>BMJ Open</i>                                                                                                                                                                                                                                               |
| Manuscript ID                   | bmjopen-2018-027152.R2                                                                                                                                                                                                                                        |
| Article Type:                   | Research                                                                                                                                                                                                                                                      |
| Date Submitted by the Author:   | 21-Feb-2019                                                                                                                                                                                                                                                   |
| Complete List of Authors:       | Wang, Dahui; Hangzhou Normal University<br>Zhang, Huai; Hangzhou Normal University,<br>Ma, Haiyan; Hangzhou Normal University<br>Zhang, Long; Hangzhou Normal University<br>Yang, Lei; Hangzhou Normal University<br>Xu, Liangwen; Hangzhou Normal University |
| <b>Primary Subject Heading</b>: | Public health                                                                                                                                                                                                                                                 |
| Secondary Subject Heading:      | Epidemiology, Ear, nose and throat/otolaryngology                                                                                                                                                                                                             |
| Keywords:                       | hearing loss, hearing thresholds, lifestyle factors, environmental factors                                                                                                                                                                                    |
|                                 |                                                                                                                                                                                                                                                               |

SCHOLARONE™  
Manuscripts

1  
2  
3  
4  
5  
6  
7  
8

# Population-based cross-sectional study on the hearing threshold levels and hearing loss among people in Zhejiang, China

9 Dahui Wang <sup>\*a</sup>, Huai Zhang <sup>\*a</sup>, Haiyan Ma <sup>a</sup>, Long Zhang <sup>a</sup>, Lei Yang <sup>✉a</sup>,  
10  
11 Liangwen Xu <sup>✉a</sup>

12  
13 <sup>a</sup> The Medical School, Hangzhou Normal University, Hangzhou, Zhejiang, China.  
14  
15

16  
17  
18 \* These authors contributed equally to this work.  
19

20 **Word count:** 2985 words in Main Text; 252 words in Abstract  
21

22 **Total figures:** 4 **Total tables:** 3  
23

24  
25 <sup>✉</sup> Correspondence:

26  
27 Liangwen Xu, Hangzhou Normal University, No.58, Haishu Rd, Cangqian, Yuhang  
28 District, Hangzhou, Zhejiang, P.R. China, tel: +86 18857717938, fax: +86-571-  
29 28865000, e-mail: [tougaoscihz@163.com](mailto:tougaoscihz@163.com)  
30  
31

32  
33  
34  
35  
36 Lei Yang, Hangzhou Normal University, Zhejiang, P.R. China, tel: +86-571-  
37 28865010, fax: +86-571-28865000, e-mail: [yanglei63@hznu.edu.cn](mailto:yanglei63@hznu.edu.cn)  
38  
39  
40  
41  
42  
43  
44  
45  
46  
47  
48  
49  
50  
51  
52  
53  
54  
55  
56  
57  
58  
59  
60

## ABSTRACT

**Objectives:** Hearing loss ( $\geq 26$  dB threshold in the better ear), as a common chronic condition in humans, is increasingly gaining attention. Relevant research in China is relatively scarce, so we conduct a population-based study to investigate the prevalence of hearing loss among age groups, genders, and ears in Zhejiang province, China from September 2016 to June 2018.

**Study design:** A Population-based cross sectional study.

**Participants:** 3754 participants aged 18-98 years and living in Zhejiang Province, China.

**Outcome measures:** Pure-tone audiometric thresholds were measured at frequencies of 0.125–8 kHz for each subject. All participants were asked to complete a structured questionnaire, in the presence of a healthcare official.

**Results.** The prevalence of speech-frequency and high-frequency hearing loss was 27.9% and 42.9%, respectively, in Zhejiang. There were significant differences in auditory thresholds at most frequencies among the age groups, genders (male versus female: 31.6% versus 24.1% at speech-frequency; 48.9% versus 36.8% at high-frequency), and ears. In addition to the common factors affecting both types of hearing loss, significant correlation was found between personal income and speech-frequency hearing loss (odds ratio [OR]=0.69, 95% confidence interval [CI]: 0.52-0.92), and between hyperlipidaemia and high-frequency hearing loss (OR=1.45, 95% CI: 1.02-2.07).

**Conclusion.** The prevalence of hearing loss was high among people living in Zhejiang, particularly males, and in the left ear. Moreover, hearing thresholds increased with age. Several lifestyle and environment factors, which can be influenced by awareness and education, were significantly associated with hearing loss.

**Key words:** hearing loss, hearing thresholds, lifestyle factors, environmental factors.

## Article Summary

### Strengths and limitations of this study.

To our knowledge, this is the first study to be conducted in Zhejiang, China, involving a large population, with data from a wide band of hearing frequencies.

The study investigated whether several lifestyle and environment factors, which can be influenced by awareness and education, were related to hearing loss, and this could provide some ideas for future intervention studies.

The specific values of medical related indicators (such as systolic blood pressure, triglyceride and fasting blood-glucose) were not analysed as these data were not collected completely, hence, medical covariates were collected only based on self-reported diagnosis (as dichotomous variable, i.e., yes or no).

## 1. Introduction

Hearing loss, the most common sensory deficit in humans<sup>1</sup>, is increasingly gaining attention; the World Health Organization estimated that the prevalence of hearing loss increased from 42 million in 1985 to 360 million in 2011.<sup>2</sup> According to a US study, more than 36 million people (16–17% adolescents) suffered from varying degrees of hearing loss.<sup>3</sup> Moreover, Twardella et al. reported that the prevalence of hearing loss among adolescents in Germany was approximately 2.4%.<sup>4</sup> Although the literature on hearing loss has gradually increased, these studies were either conducted in countries other than China, or the number of participants was small.<sup>5</sup> In addition, the hearing test did not cover a wide band of frequencies.<sup>6</sup>

As a common chronic condition in humans, hearing loss affects communication and can, therefore, affect the quality of life of the individual. Furthermore, it has substantial direct and indirect societal costs.<sup>7</sup> Moreover, in the 25-year Global Burden of Disease study, hearing loss was the second most common non-fatal disease affecting the quality of life of Chinese individuals.<sup>8</sup> However, the exact mechanisms of hearing loss remain unclear. Thus, there is an urgent need to study the prevalence of hearing loss and its related risk factors. Several studies have reported that hearing function is associated with age, sex, heredity, and environmental factors (such as noise exposure and heavy metal exposure)<sup>9, 10</sup>, but similar research in China is still relatively scarce.

Hence, in the present study, data of audiometric measurements and responses to structured questionnaires were collected to investigate the prevalence of hearing loss in adults in Zhejiang, China; while other Chinese studies were conducted elsewhere, this is the first study to be conducted in Zhejiang with a large sample size and wide band of frequencies (0.125 to 8 kHz). What's more, Zhejiang is a typical representative of the eastern coastal provinces of China. It has a relatively developed economy, a large



1  
2  
3 population, and is one of the larger provinces in China. An epidemiological study can  
4 well describe the hearing threshold levels and hearing loss in the Chinese population,  
5 and provide some data that can be used to develop interventions for preventing early  
6 hearing loss as well as for further investigation.  
7  
8  
9  
10  
11  
12  
13

## 14 **2. Methods**

### 15 *Study Areas and Participants*

16  
17 A study using a multi-stage stratified cluster random sampling method was conducted  
18 in the Zhejiang province from September 2016 to June 2018. Five healthcare centres  
19 were selected as follows: 1 in Jiangshan, 1 in Jiaying, and 3 in Hangzhou (Tonglu  
20 county, Baiyang community, and Sijiqing community). Complete audiometric  
21 examination data and questionnaire data of 3754 participants (1900 males and 1854  
22 females) (18–98 years old) were analysed. The participants were divided into 3 age  
23 groups: the young group (18–44 years old, mean age=34.19±6.35 [mean±standard  
24 deviation]), the middle group (45–59 years old, mean age=51.82±4.34), and the old  
25 group (60–98 years old, mean age=68.07±7.14).<sup>11</sup>  
26  
27  
28  
29  
30  
31  
32  
33  
34  
35  
36  
37  
38  
39

40 The whole process of study was approved by the Ethics Committee of Hangzhou  
41 Normal University. All subjects provided written informed consent and the study had  
42 been performed in accordance with the ethical standards laid down in the 1964  
43 Declaration of Helsinki and its later amendments and local government policies.  
44  
45  
46  
47  
48

### 49 *Patient and public involvement*

50  
51 The role of subjects (including patients) in this study was participants. All subjects did  
52 not participate in the design, recruitment and other research work. After the completion  
53 of the study, we had called participants to elaborate on the results of this study in detail  
54 (if they indicated that they needed the results at the time of data collection).  
55  
56  
57  
58  
59  
60

### *Audiometry test*

First, otoscopic examination was performed for each participant by an otolaryngologist to detect any ear pathology potentially affecting hearing function. A total of 631 participants (14.39% [631/4385]) who had an ear disease (such as otitis externa, otitis media, or cerumen impaction) or abnormal ear structure were excluded from the analysis. All pure-tone air conduction hearing thresholds were measured by trained researchers using audiometers (AT235; Interacoustics AS, Assens, Denmark) with standard headphones (TDH-39; Telephonic Corporation, Farmingdale, USA). Each subject was specifically instructed to press a handheld response key as soon as they heard a tone of a frequency between 0.125 and 8 kHz (0.125, 0.25, 0.5, 1, 2, 3, 4, 6, and 8 kHz) over an intensity range of -10 to 110 dB in a soundproof booth with background noise of less than 20 dB(A). All facilities were calibrated before use, and similar to the study conducted by Wang et al.<sup>5</sup>, we conducted the testing by beginning at 1 kHz, continuing to higher test frequencies and then returning to 1 kHz, followed by testing lower frequencies.<sup>5</sup> We computed the pure-tone average (PTA) at speech frequencies (0.5, 1, 2, and 4 kHz; speech-PTA), and at high frequencies (3, 4, 6, and 8 kHz; high-PTA).<sup>12</sup> Hearing loss was defined as speech-PTA of  $\geq 26$  dB in the better ear,<sup>9</sup> which is consistent with the WHO definition of clinically significant hearing loss,<sup>13</sup> and this can identify patients with bilateral hearing loss and related functional impairments.<sup>14</sup>

### *Covariates*

All participants were asked to complete a structured questionnaire, in the presence of a healthcare official, covering demographic variables, audiometric information, lifestyle and environmental factors, as well as issues related to various risk factors and diseases. Education level was categorized as elementary school or less, middle school graduation, high school graduation, and college or more. Average monthly income was classified

1  
2  
3 into 3 categories (low:  $\leq 4000$  RMB; middle: 4001–6000 RMB; high:  $\geq 6001$  RMB).  
4  
5 Based on the history of cigarette smoking status, participants were categorized as  
6  
7 follows: self-reported non-smokers (smoking less than 1 cigarette a day on average for  
8  
9 less than 1 year), former smokers (cessation of smoking since the past 6 months or  
10  
11 more), and current smokers (smoking at least one cigarette a day for more than 1 year).  
12  
13 Based on drinking history, participants were also categorized as follows: self-reported  
14  
15 non-drinkers (less than once per week), former drinkers (abstinence for more than 6  
16  
17 months), and current drinkers (alcohol consumption at least once a week for more than  
18  
19 6 months). If a participant indicated an exposure to loud noise in the workplace at least  
20  
21 once a week, then the participant was considered to experience occupational noise  
22  
23 exposure. If the participant had been exposed to loud noise outside of work (e.g., loud  
24  
25 music or power tools) at least once a week, then the participant was considered to be  
26  
27 exposed to recreational noise. To emphasize an important point, the volume of the noise  
28  
29 is the subjective feeling of the participant, so if a participant felt that the sound was too  
30  
31 loud to feel uncomfortable, then he/she was considered to be exposed to loud noise.  
32  
33 Self-reported medical information, mainly about hypertension, hyperlipidaemia,  
34  
35 diabetes, and hypercholesterolemia, was also collected.  
36  
37  
38  
39  
40  
41

#### 42 ***Statistical analysis***

43  
44 The study used Epidata 3.1 (The Epidata Association, Odense, Denmark) for survey  
45  
46 data entry and check and error correction (double entry and validation). SPSS (version  
47  
48 19.0 for Windows; SPSS, Inc., Chicago, USA) was used to conduct all statistical  
49  
50 analyses, and the results were graphed using the SigmaPlot 12.0 software package  
51  
52 (Systat Software International., Chicago, USA). A Kolmogorov-Smirnov normality test  
53  
54 was performed to examine the distribution of each variable. Data were presented as  
55  
56 proportions, mean $\pm$ standard deviation (SD), or median (interquartile range), according  
57  
58  
59  
60

1  
2  
3 to the original data distribution. The Student's t-test and chi square test were used to  
4  
5 compare differences between the groups. In addition, the differences between the left  
6  
7 and right ear were analysed using the paired t-test, and the Bonferroni correction for  
8  
9 pairwise comparisons. Logistic regression was used to estimate the association between  
10  
11 hearing loss (as binary variable, which could better represent the odds ratio of different  
12  
13 factors in the two populations) and the variables (as categorical variables), after  
14  
15 adjustment for age and gender. All reported probability values were two-tailed, and a *P*  
16  
17 value of less than 0.05 was considered statistically significant.  
18  
19  
20  
21  
22  
23

### 24 **3. Results**

#### 25 *Comparison of hearing thresholds among different populations*

26  
27 The PTA for all age groups at speech frequency and high frequency is shown in Figure  
28  
29 1 and Figure 2, respectively. There were statistically significant differences between  
30  
31 the left and right ear (when age was over 60 years,  $P < 0.05$ ) with respect to PTA, both  
32  
33 in speech frequency (33.91dB versus 32.21dB [total participants, age was over 60  
34  
35 years]) and high frequency (42.32dB versus 40.18dB), and the hearing loss was more  
36  
37 prevalent in the left ear.  
38  
39  
40  
41

42  
43 There were significant differences between the male and female participants in the  
44  
45 young, middle, and old group (especially at 3, 4, 6, and 8 kHz,  $P < 0.05$ , data not shown)  
46  
47 (Figure 3). In general, compared with men, women had better hearing (male versus  
48  
49 female: 31.6% versus 24.1% at speech-frequency; 48.9% versus 36.8% at high-  
50  
51 frequency [Table 1]). Meanwhile, Table 1 and Table S1 (comprising original PTA data)  
52  
53 show that significant differences in hearing loss were found among the three selected  
54  
55 areas. The prevalence of hearing loss in Hangzhou was the highest (33.3% for speech-  
56  
57 frequency, and 53.9% for high-frequency hearing loss). Moreover, Figure 4 shows the  
58  
59  
60

1  
2  
3 PTA at the examined frequencies (0.125 to 8 kHz) among men and women in the  
4  
5 different age groups. There were significant differences among age groups for both ears  
6  
7 ( $P<0.05$ ) at all frequencies. PTA was the highest in the old group, and lowest in the  
8  
9 young group.  
10  
11  
12  
13  
14  
15  
16  
17  
18  
19  
20  
21  
22  
23  
24  
25  
26  
27  
28  
29  
30  
31  
32  
33  
34  
35  
36  
37  
38  
39  
40  
41  
42  
43  
44  
45  
46  
47  
48  
49  
50  
51  
52  
53  
54  
55  
56  
57  
58  
59  
60

For peer review only

Table 1. Hearing loss in different areas stratified by gender and age.

| Gender | Age    | Speech-frequency hearing loss $\geq 26$ dB |                    |                    |            | High-frequency hearing loss $\geq 26$ dB |                    |                    |            |
|--------|--------|--------------------------------------------|--------------------|--------------------|------------|------------------------------------------|--------------------|--------------------|------------|
|        |        | Jiangshan, %                               | Jiaying, %         | Hangzhou, %        | <i>P</i> * | Jiangshan, %                             | Jiaying, %         | Hangzhou, %        | <i>P</i> * |
| Male   | Young  | 5.2<br>(13/249)                            | 14.2<br>(27/190)   | 7.8<br>(18/230)    | 0.003      | 13.3<br>(33/249)                         | 18.4<br>(35/190)   | 18.7<br>(43/230)   | 0.202      |
|        | Middle | 27.0<br>(65/241)                           | 24.6<br>(44/179)   | 30.8<br>(60/195)   | 0.398      | 52.3<br>(126/241)                        | 33.5<br>(60/179)   | 67.7<br>(132/195)  | <0.001     |
|        | Old    | 65.2<br>(131/201)                          | 51.2<br>(84/164)   | 62.9<br>(158/251)  | 0.015      | 88.6<br>(178/201)                        | 61.0<br>(100/164)  | 88.4<br>(222/251)  | <0.001     |
| Female | Young  | 3.9<br>(10/256)                            | 4.8<br>(12/248)    | 5.3<br>(14/265)    | 0.751      | 7.8<br>(20/256)                          | 12.1<br>(30/248)   | 14.7<br>(39/265)   | 0.046      |
|        | Middle | 18.8<br>(38/202)                           | 21.9<br>(34/155)   | 26.8<br>(59/220)   | 0.141      | 29.2<br>(59/202)                         | 34.8<br>(54/155)   | 50.0<br>(110/220)  | <0.001     |
|        | Old    | 48.0<br>(47/98)                            | 45.4<br>(69/152)   | 63.2<br>(163/258)  | 0.001      | 71.4<br>(70/98)                          | 53.9<br>(82/152)   | 84.9<br>(219/258)  | <0.001     |
| Total  |        | 24.4<br>(304/1247)                         | 24.8<br>(270/1088) | 33.3<br>(472/1419) | <0.001     | 39.0<br>(486/1247)                       | 33.2<br>(361/1088) | 53.9<br>(765/1419) | <0.001     |

\* Chi square test.  $P < 0.05$  indicated a significant difference in the prevalence of hearing loss among the three selected areas stratified by gender and age.

### ***The correlation between hearing loss and covariates***

Of the 3754 eligible participants, a total of 1046 (27.9%) had speech-frequency hearing loss, and 1612 (42.9%) had high-frequency hearing loss. Table 2 shows the results of the comparison of the sociodemographic characteristics of the participants affected by hearing loss at speech-frequency and high-frequency. Participants with hearing loss group were on average 17 years older than those without hearing loss. Furthermore, there was a higher proportion of men in the hearing-loss group than in the normal-hearing group (speech-frequency, 57.4% versus 48.0%,  $P<0.001$ ; high-frequency, 57.6% versus 45.3%,  $P<0.001$ ). In addition, education, personal income, noise exposure (Table S2), smoking status, and drinking status were significantly associated with both types of hearing loss (all  $P<0.001$ ). As for medical covariate data, there was a significant correlation between hearing loss and presence of hypertension, hyperlipidaemia, diabetes, and hypercholesterolemia (all  $P<0.001$ , for speech-frequency and high-frequency hearing loss).

Table 2. Characteristics of study participants

|                                 | Speech-frequency hearing loss $\geq 26$ dB |                   |          | High-frequency hearing loss $\geq 26$ dB |                   |          |
|---------------------------------|--------------------------------------------|-------------------|----------|------------------------------------------|-------------------|----------|
|                                 | No                                         | Yes               | <i>P</i> | No                                       | Yes               | <i>P</i> |
| Number                          | 2708                                       | 1046              |          | 2142                                     | 1612              |          |
| Age, years                      | 45.28 $\pm$ 13.56                          | 61.97 $\pm$ 12.38 | <0.001   | 42.83 $\pm$ 12.92                        | 59.37 $\pm$ 12.68 | <0.001   |
| Gender, % (men)                 | 48.0                                       | 57.4              | <0.001   | 45.3                                     | 57.6              | <0.001   |
| Education, %                    |                                            |                   |          |                                          |                   |          |
| $\leq$ Elementary school        | 7.2                                        | 23.9              |          | 5.5                                      | 20.3              |          |
| Middle school                   | 20.6                                       | 28.9              |          | 17.5                                     | 30.1              |          |
| High school                     | 27.4                                       | 26.5              |          | 28.0                                     | 26.0              |          |
| $\geq$ College                  | 44.8                                       | 20.7              | <0.001   | 49.1                                     | 23.5              | <0.001   |
| Income: low/middle/high, %      | 37.1/44.7/18.2                             | 55.2/32.2/12.6    | <0.001   | 34.9/46.9/18.2                           | 51.7/33.7/14.6    | <0.001   |
| Smoking: non/former/current, %  | 79.0/4.6/16.4                              | 62.2/11.8/26.0    | <0.001   | 83.1/3.5/13.4                            | 62.6/10.7/26.7    | <0.001   |
| Drinking: non/former/current, % | 83.9/1.4/14.7                              | 69.1/2.6/28.3     | <0.001   | 86.5/1.4/12.1                            | 70.9/2.1/27.0     | <0.001   |
| Occupational noise exposure, %  | 36.5                                       | 46.7              | <0.001   | 35.7                                     | 44.2              | <0.001   |
| Recreational noise exposure, %  | 21.4                                       | 31.3              | <0.001   | 20.5                                     | 28.9              | <0.001   |
| Hypertension, %                 | 13.7                                       | 43.7              | <0.001   | 10.2                                     | 37.8              | <0.001   |
| Hyperlipidemia, %               | 4.9                                        | 13.6              | <0.001   | 3.3                                      | 12.7              | <0.001   |
| Diabetes, %                     | 3.2                                        | 12.4              | <0.001   | 1.8                                      | 11.0              | <0.001   |
| Hypercholesterolemia, %         | 2.0                                        | 5.2               | <0.001   | 1.7                                      | 4.4               | <0.001   |

Note: *P* values based on Student's t-test for continuous variables and chi square test for categorical variables, and *P*<0.05 indicated that the independent variables were statistically different between the two groups.



1  
2  
3 After adjustment for age and gender, a logistic regression analysis was performed to  
4 estimate the correlation between hearing loss and independent variables (Table 3). The  
5 correlation between education and speech-frequency hearing was not significant  
6 ( $P=0.064$ ), although the risk of hearing loss decreased as the level of education  
7 increased. High personal income was found to have a significant negative correlation  
8 with hearing loss (odds ratio [OR]=0.69, 95% confidence intervals [CI]: 0.52–0.92,  
9  $P=0.025$ ). The adjusted ORs for the comparison of current smokers and non-smokers  
10 and current drinkers and non-drinkers were 1.43 (95% CI: 1.11–1.85) ( $P$  for  
11 trend=0.007) and 1.44 (95% CI: 1.15–1.82) ( $P$  for trend=0.004), respectively. The  
12 results showed that both types of noise exposures were risk factors for hearing loss. As  
13 for common chronic diseases, no significant association was found between presence  
14 of hyperlipidaemia or hypercholesterolemia and hearing loss (for hyperlipidaemia,  
15 OR=1.03, 95% CI: 0.75–1.41,  $P=0.848$ ; for hypercholesterolemia, OR=1.31, 95% CI:  
16 0.81–2.12,  $P=0.275$ ). Hearing loss was associated with diabetes with borderline  
17 significance (OR=1.39, 95% CI: 0.99–1.95,  $P=0.061$ ), and hypertension was found to  
18 be significantly associated with hearing loss (OR=2.28, 95% CI: 1.87–2.79,  $P<0.001$ ).  
19  
20  
21  
22  
23  
24  
25  
26  
27  
28  
29  
30  
31  
32  
33  
34  
35  
36  
37  
38  
39

40 Moreover, smoking, drinking, occupational noise, recreational noise, hypertension,  
41 and diabetes were risk factors for high-frequency hearing loss, whereas a high education  
42 level was a protective factor. In contrast with speech-frequency hearing loss,  
43 hyperlipidaemia was positively associated with hearing loss (OR=1.45, 95% CI: 1.02–  
44 2.07,  $P=0.039$ ), while no significant association was found between income and hearing  
45 loss. The effects of smoking and hypertension on hearing loss were the greatest (for  
46 smoking, OR=2.08, 95% CI: 1.63–2.65; for hypertension, OR=2.17, 95% CI: 1.76–  
47 2.68).  
48  
49  
50  
51  
52  
53  
54  
55  
56  
57  
58  
59  
60

Table 3. Logistic regression analysis of all the correlations of hearing loss

|                     | Speech-frequency hearing loss $\geq 26$ dB |                  |                 | High-frequency hearing loss $\geq 26$ dB |                  |                 |
|---------------------|--------------------------------------------|------------------|-----------------|------------------------------------------|------------------|-----------------|
|                     | Yes/Total                                  | ORs (95% CIs)    | <i>P</i> -trend | Yes/Total                                | OR (95% CI)      | <i>P</i> -trend |
| Education           |                                            |                  |                 |                                          |                  |                 |
| ≤ Elementary school | 250/445                                    | 1 (Reference)    |                 | 328/445                                  | 1 (Reference)    |                 |
| Middle school       | 302/860                                    | 0.75 (0.57-0.98) |                 | 486/860                                  | 0.93 (0.70-1.25) |                 |
| High school         | 277/1018                                   | 0.73 (0.55-0.97) |                 | 419/1018                                 | 0.65 (0.48-0.87) |                 |
| ≥ College           | 217/1431                                   | 0.66 (0.48-0.90) | 0.064           | 379/1431                                 | 0.60 (0.43-0.82) | <0.001          |
| Income              |                                            |                  |                 |                                          |                  |                 |
| Low                 | 577/1581                                   | 1 (Reference)    |                 | 834/1581                                 | 1 (Reference)    |                 |
| Middle              | 337/1547                                   | 0.80 (0.65-0.99) |                 | 543/1547                                 | 0.82 (0.67-0.99) |                 |
| High                | 132/626                                    | 0.69 (0.52-0.92) | 0.025           | 235/626                                  | 0.89 (0.69-1.16) | 0.129           |
| Smoking             |                                            |                  |                 |                                          |                  |                 |
| non-                | 651/2789                                   | 1 (Reference)    |                 | 1009/2789                                | 1 (Reference)    |                 |
| former-             | 123/248                                    | 1.50 (1.07-2.11) |                 | 173/248                                  | 1.85 (1.30-2.64) |                 |
| current-            | 272/717                                    | 1.43 (1.11-1.85) | 0.007           | 430/717                                  | 2.08 (1.63-2.65) | <0.001          |
| Drinking            |                                            |                  |                 |                                          |                  |                 |
| non-                | 723/2995                                   | 1 (Reference)    |                 | 1143/2995                                | 1 (Reference)    |                 |
| former-             | 27/65                                      | 1.64 (0.87-3.09) |                 | 34/65                                    | 1.13 (0.60-2.13) |                 |
| current-            | 296/694                                    | 1.44 (1.15-1.82) | 0.004           | 435/694                                  | 1.38 (1.10-1.74) | 0.022           |
| Occupational noise  |                                            |                  |                 |                                          |                  |                 |
| no                  | 557/2277                                   | 1 (Reference)    |                 | 899/2277                                 | 1 (Reference)    |                 |
| yes                 | 489/1477                                   | 1.35 (1.12-1.62) | 0.001           | 713/1477                                 | 1.29 (1.08-1.54) | 0.004           |
| Recreational noise  |                                            |                  |                 |                                          |                  |                 |
| no                  | 719/2848                                   | 1 (Reference)    |                 | 1134/2825                                | 1 (Reference)    |                 |
| yes                 | 327/906                                    | 1.39 (1.13-1.70) | 0.002           | 461/896                                  | 1.39 (1.14-1.70) | 0.001           |
| Hypertension        |                                            |                  |                 |                                          |                  |                 |
| no                  | 589/2926                                   | 1 (Reference)    |                 | 1003/2926                                | 1 (Reference)    |                 |
| yes                 | 457/828                                    | 2.28 (1.87-2.79) | <0.001          | 609/828                                  | 2.17 (1.76-2.68) | <0.001          |

1  
2  
3  
4  
5  
6  
7  
8  
9  
10  
11  
12  
13  
14  
15  
16  
17  
18  
19  
20  
21  
22  
23  
24  
25  
26  
27  
28  
29  
30  
31  
32  
33  
34  
35  
36  
37  
38  
39  
40  
41  
42  
43  
44  
45  
46

|                      |          |                  |       |           |                  |       |
|----------------------|----------|------------------|-------|-----------|------------------|-------|
| Hyperlipidemia       |          |                  |       |           |                  |       |
| no                   | 904/3479 | 1 (Reference)    |       | 1407/3479 | 1 (Reference)    |       |
| yes                  | 142/275  | 1.03 (0.75-1.41) | 0.848 | 205/275   | 1.45 (1.02-2.07) | 0.039 |
| Diabetes             |          |                  |       |           |                  |       |
| no                   | 916/3538 | 1 (Reference)    |       | 1435/3538 | 1 (Reference)    |       |
| yes                  | 130/216  | 1.39 (0.99-1.95) | 0.061 | 177/216   | 1.82 (1.21-2.75) | 0.004 |
| Hypercholesterolemia |          |                  |       |           |                  |       |
| no                   | 992/3647 | 1 (Reference)    |       | 1541/3647 | 1 (Reference)    |       |
| yes                  | 54/107   | 1.31 (0.81-2.12) | 0.275 | 71/107    | 1.01 (0.60-1.69) | 0.983 |

Note: analysis were adjusted for gender and age. Age was represented by categorical variables.

#### 4. Discussion

This cross-sectional study, conducted in a large population and based on a cohort of local individuals in the Zhejiang province, provides information about the hearing threshold levels and prevalence of hearing loss among the people in Zhejiang, China. Based on the standard definition (speech-PTA [i.e., the average of 0.5, 1, 2, and 4 kHz hearing threshold] of  $\geq 26$  dB in the better ear), we estimated that 27.9% of the participants had speech-frequency hearing loss, which is different from the prevalence reported in other Chinese studies i.e., those conducted by Bu<sup>15</sup> and Gong<sup>6</sup> (11.7% and 58.85%). Differences in education, economics, and industrialization level due to geographical distribution of the population surveyed may be one of the reasons. On the other hand, the study by Gong et al was conducted among older adults ( $\geq 60$  years), surprisingly, the prevalence of hearing loss in the elderly in our study was calculated as 58.23%, which was very close to that of Gong. Consistent with other studies<sup>5, 16, 17</sup>, women often had a lower PTA than men, at most frequencies (from 1 to 8 kHz), in both the left and right ear. Among these examined frequencies, significant differences were found between the young, middle and old groups for PTA ( $P < 0.001$ ), confirming that the hearing threshold increases with age, both in males and females.<sup>18</sup> Furthermore, Sommer reported that a 1-year increase in age would raise the risk of hearing loss by 15%.<sup>14</sup>

Right ear dominance for PTA was identified in this study. Especially in participants older than 60 years, the right ear had better hearing ability than the left, which can be explained from the perspective of neurology. The ascending auditory projections pass through the brainstem and end in the cerebral cortex of the ipsi- and contra-lateral hemispheres, with a predominant representation on the side opposite to the ear.<sup>19</sup> In brief, the sound collected through the right ear is formed in the left hemisphere, and

1  
2  
3 vice versa. Therefore, based on the anatomical characteristics of the human brain, right  
4 ear input is directly transferred to the speech perception areas in the left hemisphere,  
5  
6 whereas stimuli to the left ear have to be transferred initially to the right hemisphere,  
7  
8 from which it is transferred to the left hemisphere through the corpus callosum.<sup>19</sup> Some  
9  
10 studies have also identified the right ear dominance in certain populations,<sup>20-22</sup> which  
11  
12 in turn, supports the above theoretical basis. In contrast, another study in Switzerland  
13  
14 suggested that PTA has no significant differences between both ears.<sup>23</sup>  
15  
16  
17  
18

19 Hangzhou had the highest prevalence of hearing loss among the three selected areas.  
20  
21 As a modern city with a highly developed economy, Hangzhou is filled with industrial  
22  
23 noise, whereas the other two regions have a slightly less-developed economy, with less  
24  
25 industrial noise. This is similar to inferences made by Wang et al.<sup>5</sup> Meanwhile,  
26  
27 consistent with previous studies, noise exposures (including occupational noise and  
28  
29 recreational noise) were found to be risk factors for hearing loss,<sup>6, 24, 25</sup> while education  
30  
31 (for high-frequency hearing loss) and personal income (for speech-frequency hearing  
32  
33 loss) were protective factors. Highly educated people have a better knowledge of health,  
34  
35 and people with high personal income can prevent hearing loss by using low-noise  
36  
37 devices or by avoiding high-noise workplaces.  
38  
39  
40  
41

42 Our results support the evidence that smoking and drinking have associations with  
43  
44 the risk of hearing loss.<sup>26, 27</sup> Cruickshanks et al.<sup>28</sup> estimated that current smokers were  
45  
46 1.69 times more likely to have hearing loss than non-smokers (95% CI: 1.31–2.17),  
47  
48 which is similar to the results obtained in our study (1.66-fold, 95% CI: 1.24–2.22).  
49  
50 Similarly, a multi-centre study conducted by Fransen et al.<sup>29</sup> reported that smoking  
51  
52 significantly increased high-frequency hearing loss in a dose-dependent fashion.  
53  
54  
55

56 Among the factors evaluated in the present study, hypertension had the strongest  
57  
58 effect. The risk of hearing loss was 2 times higher in people with hypertension than in  
59  
60

1  
2  
3 those without hypertension. Similar results were also found in other studies.<sup>30, 31</sup> Our  
4 study only found borderline association between diabetes and hearing loss, similar to  
5 the equivocal results from other studies.<sup>32, 33</sup> A likely explanation for these inconsistent  
6 results is that hearing loss is only weakly associated with diabetes, whose effects may  
7 be masked by other strong factors (e.g. age<sup>6</sup>). Another explanation is that the number  
8 of participants with diabetes is small in this study.

9  
10  
11  
12  
13  
14  
15  
16  
17 The limitations of this study should be considered. First, owing to the cross-sectional  
18 study nature, a causal relationship could not be established. Second, medical covariates  
19 were collected based on self-reported diagnosis, and specific values were not analysed  
20 as these data were not collected completely. Third, similar to the study conducted by  
21 Choi<sup>34</sup>, we cannot rule out potential residual confounding by the presence of a noisy  
22 environment that were not captured by the binary variables of occupational and  
23 recreational noise (refer to exposure at the time of data collection). Fourth, the burden  
24 of hearing loss may be underestimated due to the exclusion of patients with ear diseases.

25  
26  
27  
28  
29  
30  
31  
32  
33  
34  
35  
36 In conclusion, the differences based on age and gender in hearing threshold levels  
37 and hearing loss were identified. Older men living in modern cities filled with industrial  
38 noise should pay more attention to their hearing status. We found a right ear dominance  
39 throughout all audiometric parameters. Harmful habits, like smoking and drinking, and  
40 ambient noise (including occupational and recreational noise) are associated with  
41 hearing loss. Educating and advising individuals to maintain good general health and  
42 fitness would have benefits for hearing preservation.<sup>26</sup> Furthermore, we found evidence  
43 that among several common chronic diseases, hypertension is the most closely related  
44 to hearing loss, which requires special attention to the hearing of patients with  
45 hypertension. Hearing loss is a multifactorial condition that is a result of multiple  
46 intrinsic and extrinsic factors acting on the ears, and further prospective studies, with a  
47  
48  
49  
50  
51  
52  
53  
54  
55  
56  
57  
58  
59  
60

1  
2  
3 multi-centre approach and wider ranges of exposure, are required to confirm the related  
4  
5 risk factors.  
6  
7

8 We hope that our data can provide information on hearing loss for the development  
9  
10 of national public health policies, and can help identify some related factors for early  
11  
12 intervention. As a developing country, society is more concerned about various fatal  
13  
14 diseases, economy and ecology, so that our country attaches lesser importance to  
15  
16 hearing loss than other developed countries, and we simultaneously hope to arouse the  
17  
18 government's attention to this condition.  
19  
20  
21  
22  
23  
24  
25  
26  
27  
28  
29  
30  
31  
32  
33  
34  
35  
36  
37  
38  
39  
40  
41  
42  
43  
44  
45  
46  
47  
48  
49  
50  
51  
52  
53  
54  
55  
56  
57  
58  
59  
60

1  
2  
3 **Author Contributors** DW and HZ are joint first authors. DW edited the article,  
4  
5  
6  
7  
8  
9  
10  
11  
12  
13  
14  
15  
16  
17  
18  
19  
20  
21  
22  
23  
24  
25  
26  
27  
28  
29  
30  
31  
32  
33  
34  
35  
36  
37  
38  
39  
40  
41  
42  
43  
44  
45  
46  
47  
48  
49  
50  
51  
52  
53  
54  
55  
56  
57  
58  
59  
60

oversaw data analysis and preparation of supplementary files. HZ conducted the statistical analysis, interpretation and drafted the article. HM and LZ contributed to collecting prevalence estimates and preparation of supplementary files. LY and LX originated the study and designed the analysis, and both of them are coinvestigators and approved the final version of the article.

**Funding** This work was supported by the Zhejiang Key Research and Development Program (grant number 2015C03050), and the Major Science and Technology Innovation Project of Hangzhou (grant number 20152013A01).

**Competing interests** All authors have completed the ICMJE uniform disclosure form at [http://www.icmje.org/coi\\_disclosure.pdf](http://www.icmje.org/coi_disclosure.pdf) and declare: Lei Yang and Liang-Wen Xu had financial support from the Zhejiang Key Research and Development Program and the Major Science and Technology Innovation Project of Hangzhou for the submitted work; no financial relationships with any organisations that might have an interest in the submitted work in the previous 3 years; no other relationships or activities that could appear to have influenced the submitted work.

**Ethics approval** The study was approved by the Hangzhou Normal University ethics committee.

**Data sharing statement** No additional data are available.



## References

1. Bowl MR, MM Simon, NJ Ingham, *et al.* A large scale hearing loss screen reveals an extensive unexplored genetic landscape for auditory dysfunction. *Nat Commun.* 2017; **8**(1):886.
2. Olusanya BO, KJ Neumann, JE Saunders. The global burden of disabling hearing impairment: a call to action. *Bull World Health Organ.* 2014; **92**(5):367-373.
3. Schiller JS, JW Lucas, BW Ward, *et al.* Summary health statistics for U.S. adults: National Health Interview Survey, 2010. *Vital Health Stat 10.* 2012(252):1-207.
4. Twardella D, C Perez-Alvarez, T Steffens, *et al.* The prevalence of audiometric notches in adolescents in Germany: The Ohrkan-study. *Noise Health.* 2013; **15**(67):412-419.
5. Wang JG, XY Qian, J Chen, *et al.* A Cross-Sectional Study on the Hearing Threshold Levels Among People in Qinling, Qinghai, and Nanjing, China. *American Journal of Audiology.* 2018; **27**(1):147-155.
6. Gong R, XY Hu, C Gong, *et al.* Hearing loss prevalence and risk factors among older adults in China. *International Journal Of Audiology.* 2018; **57**(5):354-359.
7. Dalton DS, KJ Cruickshanks, BE Klein, *et al.* The impact of hearing loss on quality of life in older adults. *Gerontologist.* 2003; **43**(5):661-668.
8. GBD GDaIIaPC. Global, regional, and national incidence, prevalence, and years lived with disability for 328 diseases and injuries for 195 countries, 1990-2016: a systematic analysis for the Global Burden of Disease Study 2016. *Lancet.* 2017; **390**(10100):1211-1259.
9. Agrawal Y, EA Platz, JK Niparko. Prevalence of hearing loss and differences by demographic characteristics among US adults: data from the National Health and

- 1  
2  
3 Nutrition Examination Survey, 1999-2004. *Arch Intern Med.* 2008; **168**(14):1522-  
4 1530.  
5  
6  
7  
8 10. Helzner EP, JA Cauley, SR Pratt, *et al.* Race and sex differences in age-related  
9 hearing loss: the Health, Aging and Body Composition Study. *J Am Geriatr Soc.*  
10 2005; **53**(12):2119-2127.  
11  
12  
13  
14 11. Truelsen T, S Begg, C Mathers. The global burden of cerebrovascular. *WHO Int.*  
15 2006.  
16  
17  
18  
19 12. Choi YH, H Hu, S Tak, *et al.* Occupational noise exposure assessment using  
20 O\*NET and its application to a study of hearing loss in the US general population.  
21  
22  
23  
24  
25  
26 13. Vaughan G. *Deafness and hearing loss.* 2018; Available from:  
27  
28 <http://www.who.int/news-room/fact-sheets/detail/deafness-and-hearing-loss>.  
29  
30  
31 14. Sommer J, CG Brenann-Jones, RH Eikelboom, *et al.* A population-based study of  
32 the association between dysglycaemia and hearing loss in middle age. *Diabetic*  
33  
34  
35  
36  
37  
38 15. Bu X, C Liu, G Xing, *et al.* WHO Ear and Hearing Disorders Survey in four  
39 provinces in China. *Audiological Medicine.* 2011; **9**(4):141-146.  
40  
41  
42 16. Brant LJ, S Gordon-Salant, JD Pearson, *et al.* Risk factors related to age-associated  
43 hearing loss in the speech frequencies. *J Am Acad Audiol.* 1996; **7**(3):152-160.  
44  
45  
46  
47 17. Kim JS. Prevalence and Factors Associated With Hearing Loss and Hearing Aid  
48 Use in Korean Elders. *Iranian Journal Of Public Health.* 2015; **44**(3):308-317.  
49  
50  
51 18. Liu H, H Luo, T Yang, *et al.* Association of leukocyte telomere length and the risk  
52 of age-related hearing impairment in Chinese Hans. *Sci Rep.* 2017; **7**(1):10106.  
53  
54  
55  
56 19. Westerhausen R,K Hugdahl. The corpus callosum in dichotic listening studies of  
57 hemispheric asymmetry: a review of clinical and experimental evidence. *Neurosci*  
58  
59  
60

- 1  
2  
3 *Biobehav Rev.* 2008; **32**(5):1044-1054.  
4  
5  
6 20. Budenz CL, MK Cosetti, DH Coelho, *et al.* The effects of cochlear implantation  
7 on speech perception in older adults. *J Am Geriatr Soc.* 2011; **59**(3):446-453.  
8  
9  
10 21. Keefe DH, MP Gorga, W Jesteadt, *et al.* Ear asymmetries in middle-ear, cochlear,  
11 and brainstem responses in human infants. *J Acoust Soc Am.* 2008; **123**(3):1504-  
12 1512.  
13  
14  
15 22. Sharpe RA, EL Camposeo, WK Muzaffar, *et al.* Effects of Age and Implanted Ear  
16 on Speech Recognition in Adults with Unilateral Cochlear Implants. *Audiol*  
17 *Neurotol.* 2016; **21**(4):223-230.  
18  
19  
20 23. Wettstein VG,R Probst. Right Ear Advantage of Speech Audiometry in Single-  
21 sided Deafness. *Otol Neurotol.* 2018; **39**(4):417-421.  
22  
23  
24 24. Degeest S, E Clays, P Corthals, *et al.* Epidemiology and Risk Factors for Leisure  
25 Noise-Induced Hearing Damage in Flemish Young Adults. *Noise Health.* 2017;  
26 **19**(86):10-19.  
27  
28  
29 25. Smalt CJ, J Lacirignola, SK Davis, *et al.* Noise dosimetry for tactical environments.  
30 *Hear Res.* 2017; **349**:42-54.  
31  
32  
33 26. Lin YY, LW Wu, TW Kao, *et al.* Secondhand Smoke is Associated with Hearing  
34 Threshold Shifts in Obese Adults. *Scientific Reports.* 2016; **6**.  
35  
36  
37 27. Shimokata H. Why are individual differences in the hearing ability so great in the  
38 elderly? Relationship of hearing with systemic aging.:Relationship of hearing with  
39 systemic aging. *Audiology.* 2010; **51**(3):177-184.  
40  
41  
42 28. Cruickshanks KJ, R Klein, BE Klein, *et al.* Cigarette smoking and hearing loss: the  
43 epidemiology of hearing loss study. *JAMA.* 1998; **279**(21):1715-1719.  
44  
45  
46 29. Fransen E, V Topsakal, JJ Hendrickx, *et al.* Occupational noise, smoking, and a  
47 high body mass index are risk factors for age-related hearing impairment and  
48  
49  
50  
51  
52  
53  
54  
55  
56  
57  
58  
59  
60

- 1  
2  
3 moderate alcohol consumption is protective: A European population-based  
4 multicenter study. *Jaro-Journal Of the Association for Research In*  
5  
6 *Otolaryngology*. 2008; **9**(3):264-276.  
7  
8  
9
- 10 30. Fang Q, ZC Wang, Y Zhan, *et al*. Hearing loss is associated with increased CHD  
11 risk and unfavorable CHD-related biomarkers in the Dongfeng-Tongji cohort.  
12  
13 *Atherosclerosis*. 2018; **271**:70-76.  
14  
15  
16
- 17 31. Ucler R, M Turan, F Garca, *et al*. The association of obesity with hearing  
18 thresholds in women aged 18-40 years. *Endocrine*. 2016; **52**(1):46-53.  
19  
20  
21
- 22 32. Jung DJ, JH Lee, T Kim, *et al*. Association Between Hearing Impairment and  
23 Albuminuria With or Without Diabetes Mellitus. *Clinical And Experimental*  
24 *Otorhinolaryngology*. 2017; **10**(3):221-227.  
25  
26  
27
- 28 33. Passamonti SM, F Di Berardino, P Bucciarelli, *et al*. Risk factors for idiopathic  
29 sudden sensorineural hearing loss and their association with clinical outcome.  
30  
31 *Thrombosis Research*. 2015; **135**(3):508-512.  
32  
33  
34
- 35 34. Choi YH,SK Park. Environmental Exposures to Lead, Mercury, and Cadmium and  
36 Hearing Loss in Adults and Adolescents: KNHANES 2010-2012. *Environ Health*  
37 *Perspect*. 2017; **125**(6):067003.  
38  
39  
40  
41  
42  
43  
44  
45  
46  
47  
48  
49  
50  
51  
52  
53  
54  
55  
56  
57  
58  
59  
60

## Figure legends

### **Figure 1. Pure-tone average for all ages at speech frequencies (0.5, 1, 2 and 4kHz)**

(A: total participants; B: males participants; C: female participants). The full lines indicate the hearing thresholds of left ears, and the dotted lines indicate the hearing thresholds of right ears. Bars indicate  $\pm 1$  SD. '20y' old represents people aged 18-25y old, '30y' old represent people aged 26-35y old, '40y' old range is 36-45y old, '50y' old range is 46-55y old, '60y' old range is 56-65y old, '70y' old range is 66-75y old, '80y' old range is 76-85y old, and '90y' old range is 86-98y old.

### **Figure 2. Pure-tone average for all ages at high frequencies (3, 4, 6 and 8kHz) (A:**

total participants; B: males participants; C: female participants). The full lines indicate the hearing thresholds of left ears, and the dotted lines indicate the hearing thresholds of right ears. Bars indicate  $\pm 1$  SD. '20y' old represents people aged 18-25y old, '30y' old represent people aged 26-35y old, '40y' old range is 36-45y old, '50y' old range is 46-55y old, '60y' old range is 56-65y old, '70y' old range is 66-75y old, '80y' old range is 76-85y old, and '90y' old range is 86-98y old.

### **Figure 3. Pure-tone average of different age groups (A: total participants; B: male**

participants; C: female participants). The left parts of the figures indicate the PTA of the left ears, and the right parts indicate the PTA of the right ears.

### **Figure 4. Pure-tone average of different genders (A: young group; B: middle group;**

C: old group). The left parts of the figures indicate the PTA of the left ears, and the right parts indicate the PTA of the right ears.

1  
2  
3  
4  
5  
6  
7  
8  
9  
10  
11  
12  
13  
14  
15  
16  
17  
18  
19  
20  
21  
22  
23  
24  
25  
26  
27  
28  
29  
30  
31  
32  
33  
34  
35  
36  
37  
38  
39  
40  
41  
42  
43  
44  
45  
46  
47  
48  
49  
50  
51  
52  
53  
54  
55  
56  
57  
58  
59  
60

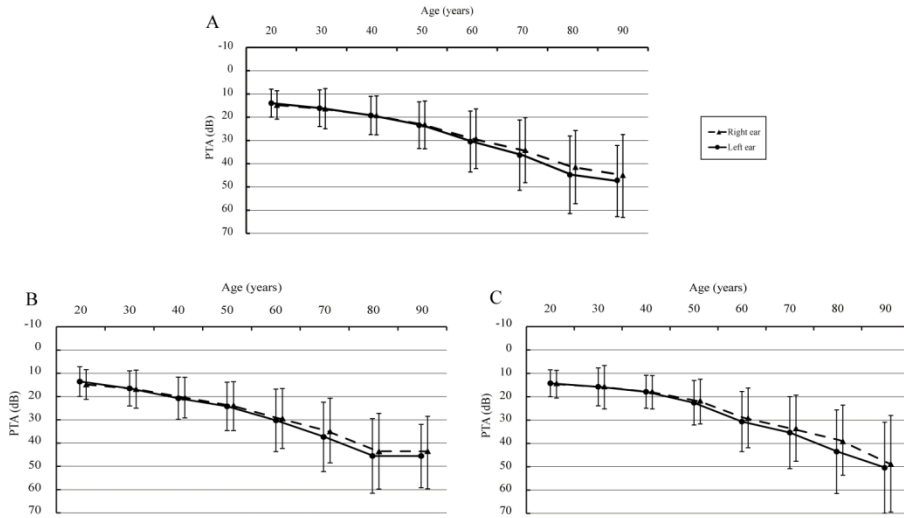

1

146x85mm (300 x 300 DPI)

1  
2  
3  
4  
5  
6  
7  
8  
9  
10  
11  
12  
13  
14  
15  
16  
17  
18  
19  
20  
21  
22  
23  
24  
25  
26  
27  
28  
29  
30  
31  
32  
33  
34  
35  
36  
37  
38  
39  
40  
41  
42  
43  
44  
45  
46  
47  
48  
49  
50  
51  
52  
53  
54  
55  
56  
57  
58  
59  
60



2

141x80mm (300 x 300 DPI)



Caption: 3



1  
2  
3  
4  
5  
6  
7  
8  
9  
10  
11  
12  
13  
14  
15  
16  
17  
18  
19  
20  
21  
22  
23  
24  
25  
26  
27  
28  
29  
30  
31  
32  
33  
34  
35  
36  
37  
38  
39  
40  
41  
42  
43  
44  
45  
46  
47  
48  
49  
50  
51  
52  
53  
54  
55  
56  
57  
58  
59  
60



4

137x82mm (300 x 300 DPI)

Supplement Table 1. Differences in PTA (dB) in the better ear among areas.

|           | Speech-frequency hearing loss $\geq 26$ dB |             |             | High-frequency hearing loss $\geq 26$ dB |             |             |
|-----------|--------------------------------------------|-------------|-------------|------------------------------------------|-------------|-------------|
|           | Total                                      | Male        | Female      | Total                                    | Male        | Female      |
| Jiangshan | 22.25±11.56                                | 23.61±12.23 | 20.10±10.34 | 27.23±16.86                              | 30.79±18.10 | 22.82±13.98 |
| Jiaxing   | 21.23±9.91                                 | 22.39±10.02 | 20.11±9.68  | 23.09±12.09                              | 24.33±12.10 | 21.90±11.98 |
| Hangzhou  | 22.57±12.18                                | 23.41±12.45 | 21.81±11.89 | 30.25±17.45                              | 32.40±18.38 | 28.29±16.32 |
| <i>P</i>  | 0.013                                      | 0.163       | 0.004       | <0.001                                   | <0.001      | <0.001      |

Supplement Table 2. Characteristics information of noise exposure.

|                     | Exposure to occupational noise |      |          | Exposure to recreational noise |      |          |
|---------------------|--------------------------------|------|----------|--------------------------------|------|----------|
|                     | No                             | Yes  | <i>P</i> | No                             | Yes  | <i>P</i> |
| Number              | 2277                           | 1477 |          | 2848                           | 906  |          |
| Age group, %        |                                |      |          |                                |      |          |
| Young               | 38.7                           | 37.7 |          | 39.9                           | 33.4 |          |
| Middle              | 32.1                           | 31.2 |          | 31.4                           | 32.8 |          |
| Old                 | 29.2                           | 31.1 | 0.431    | 28.7                           | 33.8 | 0.001    |
| Gender, % (men)     | 47.9                           | 54.8 | <0.001   | 49.0                           | 55.7 | <0.001   |
| Education, %        |                                |      |          |                                |      |          |
| ≤ Elementary school | 10.7                           | 13.6 |          | 11.7                           | 12.3 |          |
| Middle school       | 21.1                           | 25.7 |          | 23.8                           | 20.2 |          |
| High school         | 26.9                           | 27.5 |          | 26.1                           | 30.2 |          |
| ≥ College           | 41.3                           | 33.2 | <0.001   | 38.4                           | 37.3 | 0.037    |
| Income, %           |                                |      |          |                                |      |          |
| Low                 | 41.0                           | 43.9 |          | 42.8                           | 40.0 |          |
| Middle              | 39.3                           | 44.1 |          | 40.4                           | 43.6 |          |
| High                | 19.7                           | 12.0 | <0.001   | 16.8                           | 16.4 | 0.222    |

# Reporting checklist for cross sectional study.

Based on the STROBE cross sectional guidelines.

## Instructions to authors

Complete this checklist by entering the page numbers from your manuscript where readers will find each of the items listed below.

Your article may not currently address all the items on the checklist. Please modify your text to include the missing information. If you are certain that an item does not apply, please write "n/a" and provide a short explanation.

Upload your completed checklist as an extra file when you submit to a journal.

In your methods section, say that you used the STROBE cross sectional reporting guidelines, and cite them as:

von Elm E, Altman DG, Egger M, Pocock SJ, Gotsche PC, Vandenbroucke JP. The Strengthening the Reporting of Observational Studies in Epidemiology (STROBE) Statement: guidelines for reporting observational studies.

|                        |     | Reporting Item                                                                                                                  | Page Number |
|------------------------|-----|---------------------------------------------------------------------------------------------------------------------------------|-------------|
| Title                  | #1a | Indicate the study's design with a commonly used term in the title or the abstract                                              | 1           |
| Abstract               | #1b | Provide in the abstract an informative and balanced summary of what was done and what was found                                 | 2           |
| Background / rationale | #2  | Explain the scientific background and rationale for the investigation being reported                                            | 2           |
| Objectives             | #3  | State specific objectives, including any prespecified hypotheses                                                                | 2           |
| Study design           | #4  | Present key elements of study design early in the paper                                                                         | 2           |
| Setting                | #5  | Describe the setting, locations, and relevant dates, including periods of recruitment, exposure, follow-up, and data collection | 5           |
| Eligibility criteria   | #6a | Give the eligibility criteria, and the sources and methods of selection of participants.                                        | 5           |

|    |                  |      |                                                                   |     |
|----|------------------|------|-------------------------------------------------------------------|-----|
| 1  |                  | #7   | Clearly define all outcomes, exposures, predictors, potential     | 6   |
| 2  |                  |      | confounders, and effect modifiers. Give diagnostic criteria, if   |     |
| 3  |                  |      | applicable                                                        |     |
| 4  |                  |      |                                                                   |     |
| 5  |                  |      |                                                                   |     |
| 6  | Data sources /   | #8   | For each variable of interest give sources of data and details of | 6   |
| 7  | measurement      |      | methods of assessment (measurement). Describe                     |     |
| 8  |                  |      | comparability of assessment methods if there is more than one     |     |
| 9  |                  |      | group. Give information separately for for exposed and            |     |
| 10 |                  |      | unexposed groups if applicable.                                   |     |
| 11 |                  |      |                                                                   |     |
| 12 |                  |      |                                                                   |     |
| 13 |                  |      |                                                                   |     |
| 14 | Bias             | #9   | Describe any efforts to address potential sources of bias         | 6   |
| 15 |                  |      |                                                                   |     |
| 16 |                  |      |                                                                   |     |
| 17 | Study size       | #10  | Explain how the study size was arrived at                         | 6   |
| 18 |                  |      |                                                                   |     |
| 19 | Quantitative     | #11  | Explain how quantitative variables were handled in the            | 6   |
| 20 | variables        |      | analyses. If applicable, describe which groupings were chosen,    |     |
| 21 |                  |      | and why                                                           |     |
| 22 |                  |      |                                                                   |     |
| 23 |                  |      |                                                                   |     |
| 24 | Statistical      | #12a | Describe all statistical methods, including those used to control | 7   |
| 25 | methods          |      | for confounding                                                   |     |
| 26 |                  |      |                                                                   |     |
| 27 |                  |      |                                                                   |     |
| 28 |                  | #12b | Describe any methods used to examine subgroups and                | 7   |
| 29 |                  |      | interactions                                                      |     |
| 30 |                  |      |                                                                   |     |
| 31 |                  |      |                                                                   |     |
| 32 |                  | #12c | Explain how missing data were addressed                           | 7   |
| 33 |                  |      |                                                                   |     |
| 34 |                  |      |                                                                   |     |
| 35 |                  | #12d | If applicable, describe analytical methods taking account of      | n/a |
| 36 |                  |      | sampling strategy                                                 |     |
| 37 |                  |      |                                                                   |     |
| 38 |                  |      |                                                                   |     |
| 39 |                  | #12e | Describe any sensitivity analyses                                 | n/a |
| 40 |                  |      |                                                                   |     |
| 41 | Participants     | #13a | Report numbers of individuals at each stage of study—eg           | 8   |
| 42 |                  |      | numbers potentially eligible, examined for eligibility, confirmed |     |
| 43 |                  |      | eligible, included in the study, completing follow-up, and        |     |
| 44 |                  |      | analysed. Give information separately for for exposed and         |     |
| 45 |                  |      | unexposed groups if applicable.                                   |     |
| 46 |                  |      |                                                                   |     |
| 47 |                  |      |                                                                   |     |
| 48 |                  |      |                                                                   |     |
| 49 |                  | #13b | Give reasons for non-participation at each stage                  | n/a |
| 50 |                  |      |                                                                   |     |
| 51 |                  |      |                                                                   |     |
| 52 |                  | #13c | Consider use of a flow diagram                                    | n/a |
| 53 |                  |      |                                                                   |     |
| 54 | Descriptive data | #14a | Give characteristics of study participants (eg demographic,       | 8   |
| 55 |                  |      | clinical, social) and information on exposures and potential      |     |
| 56 |                  |      | confounders. Give information separately for exposed and          |     |
| 57 |                  |      | unexposed groups if applicable.                                   |     |
| 58 |                  |      |                                                                   |     |
| 59 |                  |      |                                                                   |     |
| 60 |                  |      |                                                                   |     |

|    |                  |      |                                                                      |      |
|----|------------------|------|----------------------------------------------------------------------|------|
| 1  |                  | #14b | Indicate number of participants with missing data for each           | n/a  |
| 2  |                  |      | variable of interest                                                 |      |
| 3  |                  |      |                                                                      |      |
| 4  |                  |      |                                                                      |      |
| 5  | Outcome data     | #15  | Report numbers of outcome events or summary measures.                | 8    |
| 6  |                  |      | Give information separately for exposed and unexposed                |      |
| 7  |                  |      | groups if applicable.                                                |      |
| 8  |                  |      |                                                                      |      |
| 9  |                  |      |                                                                      |      |
| 10 | Main results     | #16a | Give unadjusted estimates and, if applicable, confounder-            | 8    |
| 11 |                  |      | adjusted estimates and their precision (eg, 95% confidence           |      |
| 12 |                  |      | interval). Make clear which confounders were adjusted for and        |      |
| 13 |                  |      | why they were included                                               |      |
| 14 |                  |      |                                                                      |      |
| 15 |                  |      |                                                                      |      |
| 16 |                  |      |                                                                      |      |
| 17 |                  | #16b | Report category boundaries when continuous variables were            | 8    |
| 18 |                  |      | categorized                                                          |      |
| 19 |                  |      |                                                                      |      |
| 20 |                  |      |                                                                      |      |
| 21 |                  | #16c | If relevant, consider translating estimates of relative risk into    | n/a  |
| 22 |                  |      | absolute risk for a meaningful time period                           |      |
| 23 |                  |      |                                                                      |      |
| 24 | Other analyses   | #17  | Report other analyses done—e.g., analyses of subgroups and           | n/a  |
| 25 |                  |      | interactions, and sensitivity analyses                               |      |
| 26 |                  |      |                                                                      |      |
| 27 |                  |      |                                                                      |      |
| 28 | Key results      | #18  | Summarise key results with reference to study objectives             | 9    |
| 29 |                  |      |                                                                      |      |
| 30 |                  |      |                                                                      |      |
| 31 | Limitations      | #19  | Discuss limitations of the study, taking into account sources of     | 12   |
| 32 |                  |      | potential bias or imprecision. Discuss both direction and            |      |
| 33 |                  |      | magnitude of any potential bias.                                     |      |
| 34 |                  |      |                                                                      |      |
| 35 |                  |      |                                                                      |      |
| 36 | Interpretation   | #20  | Give a cautious overall interpretation considering objectives,       | 9-12 |
| 37 |                  |      | limitations, multiplicity of analyses, results from similar studies, |      |
| 38 |                  |      | and other relevant evidence.                                         |      |
| 39 |                  |      |                                                                      |      |
| 40 |                  |      |                                                                      |      |
| 41 | Generalisability | #21  | Discuss the generalisability (external validity) of the study        | 9-12 |
| 42 |                  |      | results                                                              |      |
| 43 |                  |      |                                                                      |      |
| 44 |                  |      |                                                                      |      |
| 45 | Funding          | #22  | Give the source of funding and the role of the funders for the       | 13   |
| 46 |                  |      | present study and, if applicable, for the original study on which    |      |
| 47 |                  |      | the present article is based                                         |      |
| 48 |                  |      |                                                                      |      |
| 49 |                  |      |                                                                      |      |

The STROBE checklist is distributed under the terms of the Creative Commons Attribution License CC-BY. This checklist was completed on 08. October 2018 using <http://www.goodreports.org/>, a tool made by the [EQUATOR Network](#) in collaboration with [Penelope.ai](#)
