# Supplementary material for: Hearing threshold levels and hearing loss among people in Zhejiang, China: a population-based cross-sectional study
Source: PubMed Central journal article supplement — BMJ Open. 2019 Apr 4;9(4):e027152. doi: 10.1136/bmjopen-2018-027152 (PMC6500382; doi:10.1136/bmjopen-2018-027152), 2019-04-04
Supplement: bmjopen-2018-027152supp001.pdf [file bmjopen-2018-027152supp001.pdf]

Supplement Table 1. Differences in PTA (dB) in the better ear among areas.

|           | Speech-frequency hearing loss $\geq 26$ dB |             |             | High-frequency hearing loss $\geq 26$ dB |             |             |
|-----------|--------------------------------------------|-------------|-------------|------------------------------------------|-------------|-------------|
|           | Total                                      | Male        | Female      | Total                                    | Male        | Female      |
| Jiangshan | 22.25±11.56                                | 23.61±12.23 | 20.10±10.34 | 27.23±16.86                              | 30.79±18.10 | 22.82±13.98 |
| Jiaxing   | 21.23±9.91                                 | 22.39±10.02 | 20.11±9.68  | 23.09±12.09                              | 24.33±12.10 | 21.90±11.98 |
| Hangzhou  | 22.57±12.18                                | 23.41±12.45 | 21.81±11.89 | 30.25±17.45                              | 32.40±18.38 | 28.29±16.32 |
| <i>P</i>  | 0.013                                      | 0.163       | 0.004       | <0.001                                   | <0.001      | <0.001      |
