# Supplementary material for: Hearing threshold levels and hearing loss among people in Zhejiang, China: a population-based cross-sectional study
Source: PubMed Central journal article supplement — BMJ Open. 2019 Apr 4;9(4):e027152. doi: 10.1136/bmjopen-2018-027152 (PMC6500382; doi:10.1136/bmjopen-2018-027152), 2019-04-04
Supplement: bmjopen-2018-027152supp002.pdf [file bmjopen-2018-027152supp002.pdf]

Supplement Table 2. Characteristics information of noise exposure.

|                     | Exposure to occupational noise |      |          | Exposure to recreational noise |      |          |
|---------------------|--------------------------------|------|----------|--------------------------------|------|----------|
|                     | No                             | Yes  | <i>P</i> | No                             | Yes  | <i>P</i> |
| Number              | 2277                           | 1477 |          | 2848                           | 906  |          |
| Age group, %        |                                |      |          |                                |      |          |
| Young               | 38.7                           | 37.7 |          | 39.9                           | 33.4 |          |
| Middle              | 32.1                           | 31.2 |          | 31.4                           | 32.8 |          |
| Old                 | 29.2                           | 31.1 | 0.431    | 28.7                           | 33.8 | 0.001    |
| Gender, % (men)     | 47.9                           | 54.8 | <0.001   | 49.0                           | 55.7 | <0.001   |
| Education, %        |                                |      |          |                                |      |          |
| ≤ Elementary school | 10.7                           | 13.6 |          | 11.7                           | 12.3 |          |
| Middle school       | 21.1                           | 25.7 |          | 23.8                           | 20.2 |          |
| High school         | 26.9                           | 27.5 |          | 26.1                           | 30.2 |          |
| ≥ College           | 41.3                           | 33.2 | <0.001   | 38.4                           | 37.3 | 0.037    |
| Income, %           |                                |      |          |                                |      |          |
| Low                 | 41.0                           | 43.9 |          | 42.8                           | 40.0 |          |
| Middle              | 39.3                           | 44.1 |          | 40.4                           | 43.6 |          |
| High                | 19.7                           | 12.0 | <0.001   | 16.8                           | 16.4 | 0.222    |
